# Supplementary material for: Gut and Gill-Associated Microbiota of the Flatfish European Plaice (Pleuronectes platessa): Diversity, Metabolome and Bioactivity against Human and Aquaculture Pathogens
Source: MDPI journal article supplement (doi:10.3390/md20090573), 2022-09-09
Supplement: s1 [file s1]

## **Gut and Gill-Associated Microbiota of the Flatfish European plaice (*Pleuronectes platessa*): Diversity, Metabolome and Bioactivity against Human and Aquaculture Pathogens**

Marjan Ghotbi <sup>1,†</sup>, Ole Kelting <sup>1,†</sup>, Martina Blümel <sup>1</sup> and Deniz Tasdemir <sup>1,2,\*</sup>

<sup>1</sup> GEOMAR Centre for Marine Biotechnology (GEOMAR-Biotech), Research Unit Marine Natural Product Chemistry, GEOMAR Helmholtz Centre for Ocean Research Kiel, Am Kiel-Kanal 44, 24106 Kiel, Germany

<sup>2</sup> Faculty of Mathematics and Natural Sciences, Kiel University, Christian-Albrechts-Platz 4, 24118 Kiel, Germany

\* Correspondence: dtasdemir@geomar.de; Tel.: +49-431-600-4430

† These authors contributed equally to this work.

### **Supplementary Figures**

**Figure S1.** Diversity and distribution of bacterial isolates from plaice gill, gut and sea water reference at family level

**Figure S2.** Diversity and distribution of plaice-derived bacteria recovered from different media at family level

**Figure S3.** Diversity and distribution of 11 seawater-derived bacterial isolates recovered from different media on A) family and B) genus level

**Figure S4.** Taxonomic distribution of 13 bioactive microorganisms at phylum level

### **Supplementary Tables**

**Table S1.** BLAST results from comparison of 66 microbial strains isolated from European plaice and seawater reference to the NCBI nucleotide database incl. Genbank accession numbers assigned to the isolates

**Table S2.** Identification of 66 microbial strains isolated from European plaice and seawater reference to the highest possible taxonomic level

**Table S3.** Biological activity of all 23 selected plaice-associated microorganisms

**Table S4.** Putative annotation of metabolites detected in *Bacillus* sp. PID21-B

**Table S5.** Putative annotation of metabolites detected in *Bacillus* sp. PI1-B

**Table S6.** Putative annotation of metabolites detected in *Microbacterium* sp. PG11-B

**Table S7.** Putative annotation of metabolites detected in *Chryseobacterium carnis* PG10-B

**Table S8.** Putative annotation of metabolites detected in *Shewanella baltica* PG1-B

**Table S9.** Putative annotation of metabolites detected in *Shewanella aestuarii* PID2-B

**Table S10.** Putative annotation of metabolites detected in *Shewanella colwelliana* PSD4-B

**Table S11.** Putative annotation of metabolites detected in *Psychrobacter* sp. PS3-B

**Table S12.** Putative annotation of metabolites detected in *Vibrio aestuarianus* PG12-B

**Table S13.** Putative annotation of metabolites detected in *Vibrio* sp. PI2-B

**Table S14.** Putative annotation of metabolites detected in *Pseudoalteromonas* sp. PI8-B

**Table S15.** Putative annotation of metabolites detected in *Aureobasidium pullulans* PI9-F

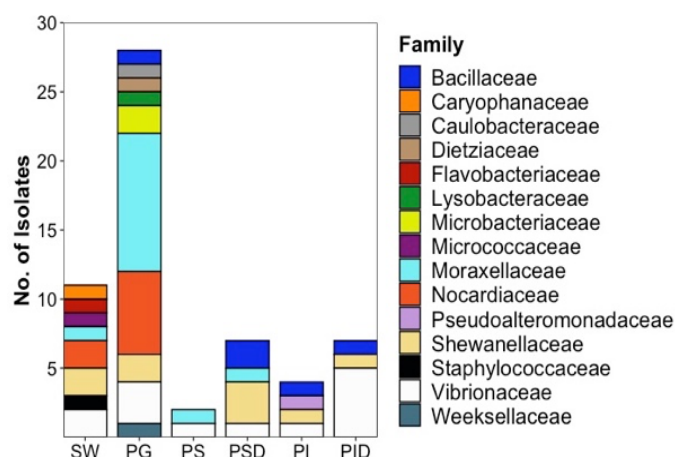

**Figure S1.** Diversity and distribution of bacterial isolates from plaice gill, gut and sea water reference at family level. SW: Sea water, PG: Plaice Gill, PS: Plaice Stomach Epithelium, PSD: Plaice Stomach Digesta, PI: Plaice Intestine Epithelium, PID: Plaice Intestine Digesta.

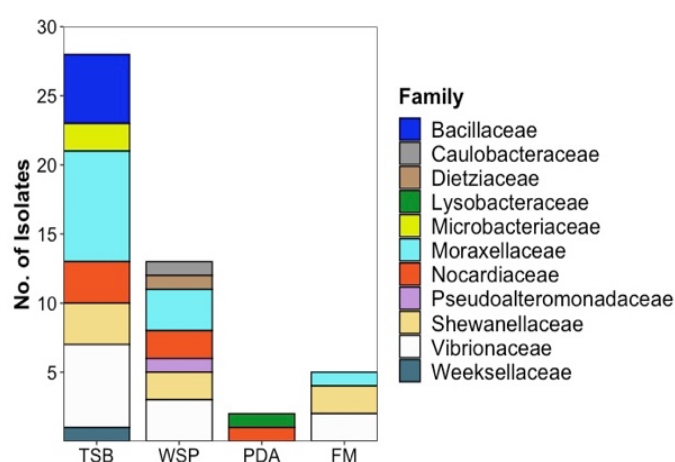

**Figure S2.** Diversity and distribution of plaice-derived bacteria recovered from different media at family level. TSB: Tryptic Soy medium, WSP: Wickerham medium, PDA: Potato Dextrose medium, FM: Fish medium.

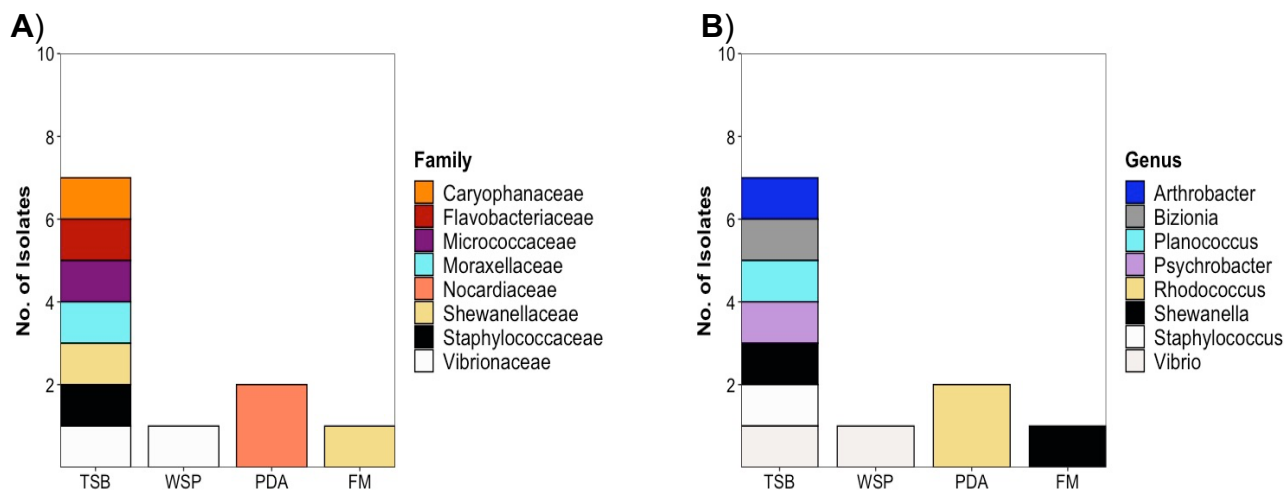

**Figure S3.** Diversity and distribution of 11 seawater-derived bacterial isolates at **A.** family and **B.** genus level recovered from different media. TSB: Tryptic Soy medium, WSP: Wickerham medium, PDA: Potato Dextrose medium, FM: Fish medium

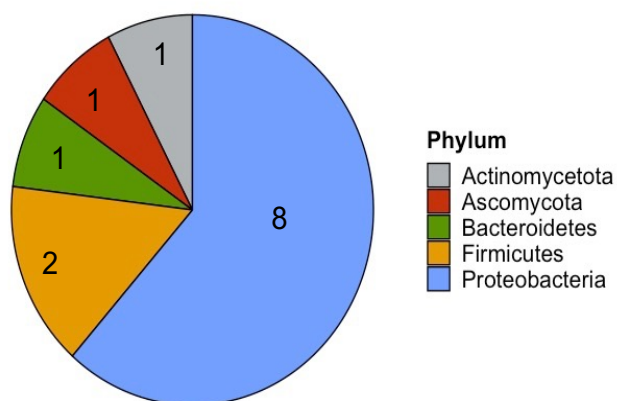

**Figure S4.** Taxonomic distribution of 13 bioactive microorganisms at phylum level. Note that the Figure contains also one bioactive fungal isolate (*A. pullulans* PI9-F belonging to Ascomycota, coloured in red).

**Table S1.** BLAST results from comparison of 66 microbial strains isolated from European plaice and the seawater reference to the NCBI nucleotide database. Given are the first 3 hits from two BLAST searches, one against all entries and the second against type strains only. Isolate codes: **PG:** Plaice Gut, **PS:** Plaice Stomach, **PSD:** Plaice Stomach Digesta, **PI:** Plaice Intestines, **PID:** Plaice Intestine Digesta, **W:** Water reference, **MCC:** Isolation on Microchip using Fish Medium, -B: Bacterium, -F: Fungus

| Strain ID | Source | Seq length (bp) | three closest relatives according to nucleotide BLAST (accession date June 13, 2022)                                 | NCBI Accession No. of closest relatives | similarity (%)          | query cover (%)   | three closest relatives according to nucleotide BLAST, only TYPE strains (accession date June 13, 2022)                                   | NCBI Accession No of closest relatives    | similarity (%)          | query cover (%)   | NCBI Genbank Acc. No |
|-----------|--------|-----------------|----------------------------------------------------------------------------------------------------------------------|-----------------------------------------|-------------------------|-------------------|-------------------------------------------------------------------------------------------------------------------------------------------|-------------------------------------------|-------------------------|-------------------|----------------------|
| PG1-B     | Gill   | 914             | Shewanella baltica strain CD-1<br>Shewanella baltica strain SB06<br>Shewanella baltica strain SN_11                  | MN220604.1<br>KT716385.1<br>KR088613.1  | 100<br>100<br>100       | 100<br>100<br>100 | Shewanella arctica type strain 40-3T<br>Shewanella hafniensis strain P010<br>Shewanella hafniensis strain NBRC 100975                     | AJ877256.1<br>NR_041296.1<br>NR_113967.1  | 99.9<br>98.5<br>97.6    | 100<br>100<br>100 | ON782585             |
| PG2-B     | Gill   | 994             | Vibrio anguillarum strain VIB16<br>Vibrio anguillarum strain 2NS-PRS3-a2<br>Vibrio anguillarum strain VIB12          | KF150783.1<br>MG264177.1<br>CP023310.1  | 99.9<br>99.7<br>99.7    | 100<br>100<br>100 | Shewanella arctica type strain 40-3T<br>Shewanella hafniensis strain P010<br>Shewanella hafniensis strain NBRC 100975                     | CP022741.1<br>CP010084.1<br>NR_148247.1   | 98.8<br>98.8<br>98.8    | 100<br>100<br>100 | ON782586             |
| PG4-B     | Gill   | 871             | Photobacterium kishitanii Taigaleon<br>Photobacterium sp. strain HS256<br>Photobacterium sp. strain HS075            | LC421662.1<br>MH269407.1<br>MH269398.1  | 100<br>100<br>100       | 100<br>100<br>100 | Photobacterium carnosum strain TMW 2.2021<br>Photobacterium piscicola strain NCCB 100098<br>Photobacterium phosphoreum strain NBRC 103031 | NR_156814.1<br>NR_125679.1<br>NR_114184.1 | 100<br>99.9<br>100      | 100<br>100<br>99  | ON782587             |
| PG5-B     | Gill   | 881             | Psychrobacter faecalis strain NC7<br>Psychrobacter faecalis strain 96D12<br>Psychrobacter pulmonis strain 96D7       | MT269580.1<br>MT013488.1<br>MT013485.1  | 100<br>100<br>100       | 100<br>100<br>100 | Psychrobacter pulmonis strain CCUG 46240<br>Psychrobacter faecalis strain DSM 14664<br>Psychrobacter pulmonis strain S-606                | NR_118026.1<br>NR_118025.1<br>NR_028974.1 | 100<br>99.8<br>99.8     | 100<br>100<br>100 | ON782588             |
| PG6-B     | Gill   | 786             | Psychrobacter glacincola strain 38-1<br>Psychrobacter sp. strain P151-L01a<br>Psychrobacter sp. strain AsK2          | MN326773.1<br>MN043902.1<br>MK560045.1  | 99.87<br>99.87<br>99.87 | 100<br>100<br>100 | Psychrobacter immobilis strain NBRC 15733<br>Psychrobacter immobilis strain ATCC 43116<br>Psychrobacter cibarius strain JG-219            | NR_113805.1<br>NR_118027.1<br>NR_043057.1 | 99.87<br>99.87<br>99.87 | 100<br>100<br>100 | ON782589             |
| PG8-B     | Gill   | 703             | Psychrobacter faecalis strain NC7<br>Psychrobacter pulmonis strain 190306H131<br>Psychrobacter faecalis strain 96D12 | MT269580.1<br>MT225754.1<br>MT013488.1  | 100<br>100<br>100       | 100<br>100<br>100 | Psychrobacter pulmonis strain CCUG 46240<br>Psychrobacter faecalis strain DSM 14664<br>Psychrobacter pulmonis strain S-606                | NR_118026.1<br>NR_118025.1<br>NR_028974.1 | 100<br>99.9<br>99.9     | 100<br>100<br>100 | ON782590             |
| PG9-B     | Gill   | 827             | Psychrobacter maritimus strain JM52<br>Psychrobacter sp. strain RSAP27<br>Psychrobacter sp. strain RSAP9             | MN758812.1<br>MH348992.1<br>MH348978.1  | 100<br>100<br>100       | 100<br>100<br>100 | Psychrobacter maritimus strain Pi2-20<br>Psychrobacter namhaensis strain SW-242<br>Psychrobacter namhaensis strain SW-242                 | NR_027225.1<br>MW227500.1<br>NR_043141.1  | 100<br>99.5<br>99.5     | 100<br>100<br>100 | ON782591             |
| PG10-B    | Gill   | 875             | Kaistella carnis strain G0081<br>Chryseobacterium sp. CH1(2015)<br>Chryseobacterium sp. B-G-R2A3                     | CP034159.1<br>KP188538.1<br>HM629415.1  | 100<br>100<br>100       | 100<br>100<br>100 | Kaistella carnis strain G0081<br>Kaistella carnis strain G81<br>Kaistella yonginensis strain HMD1043                                      | CP034159.1<br>NR_126255.1<br>NR_108572.1  | 100<br>99.8<br>98.2     | 100<br>100<br>100 | ON782592             |

|        |      |     |                                                                                                                                  |                                        |                      |                   |                                                                                                                                                             |                                          |                      |                   |          |
|--------|------|-----|----------------------------------------------------------------------------------------------------------------------------------|----------------------------------------|----------------------|-------------------|-------------------------------------------------------------------------------------------------------------------------------------------------------------|------------------------------------------|----------------------|-------------------|----------|
| PG11-B | Gill | 601 | Microbacterium sp. strain YHDJ3<br>Microbacterium<br>hydrocarbonoxydans strain J14-3-1<br>Microbacterium sp. SSW1-36             | ON351061.1<br>ON337519.1<br>CP078077.1 | 100<br>100<br>100    | 100<br>100<br>100 | Microbacterium algeriense strain G1<br>Microbacterium phyllosphaerae strain DSM<br>13468 (T)<br>Microbacterium hydrocarbonoxydans strain<br>NBRC 103074 (T) | MK480726.1<br>MK424292.1<br>MK424288.1   | 100<br>100<br>100    | 100<br>100<br>100 | ON782593 |
| PG12-B | Gill | 920 | Vibrio aestuarianus strain<br>15_075_1T2<br>Vibrio aestuarianus strain<br>15_064_4T2<br>Vibrio aestuarianus strain<br>15_061_5T2 | MK307696.1<br>MK307695.1<br>MK307693.1 | 100<br>100<br>100    | 100<br>100<br>100 | Vibrio aestuarianus subsp. cardii strain 12/122<br>3T3<br>Vibrio aestuarianus strain NBRC 15629<br>Vibrio aestuarianus strain CAIM 592                      | MK307684.1<br>NR_113780.1<br>MT759936.1  | 100<br>100<br>100    | 100<br>100<br>100 | ON782594 |
| PG14-B | Gill | 892 | Psychrobacter maritimus strain<br>JM52<br>Psychrobacter maritimus strain 24d-<br>S2<br>Psychrobacter maritimus strain 16d-<br>S4 | MN758812.1<br>MN062085.1<br>MN062076.1 | 99.9<br>99.9<br>99.9 | 100<br>100<br>100 | Psychrobacter maritimus strain Pi2-20<br>Psychrobacter namhaensis strain SW-242<br>Psychrobacter pulmonis strain CCUG 46240                                 | NR_027225.1<br>MW227500.1<br>NR_118026.1 | 99.7<br>99.5<br>99.1 | 100<br>100<br>100 | ON782595 |
| PG15-B | Gill | 737 | Stenotrophomonas rhizophila strain<br>LA-3<br>Stenotrophomonas sp. strain B10<br>Stenotrophomonas sp. strain WA7-<br>2-5         | MT631997.1<br>MT576573.1<br>MH341940.1 | 100<br>100<br>100    | 100<br>100<br>100 | Stenotrophomonas nematodicola culture<br>CPCC:101271<br>Stenotrophomonas rhizophila strain e-p10<br>Stenotrophomonas rhizophila strain<br>DSM14405          | MT126327.1<br>NR_121739.1<br>CP007597.1  | 100<br>100<br>100    | 100<br>100<br>100 | ON782596 |
| PG16-B | Gill | 759 | Rhodococcus sp. strain YF-9<br>Rhodococcus qingshengii strain<br>cqsV23<br>Rhodococcus qingshengii strain<br>cqsV7               | MT631993.1<br>MN826591.1<br>MN826576.1 | 100<br>100<br>100    | 100<br>100<br>100 | Rhodococcus erythropolis strain: JCM 3201<br>Rhodococcus erythropolis strain DSM 43066<br>Nocardia coeliaca strain DSM 44595                                | AB429553.1<br>KJ476725.1<br>NR_104776.1  | 100<br>100<br>100    | 100<br>100<br>100 | ON782597 |
| PG17-B | Gill | 808 | Psychrobacter maritimus strain<br>JM52<br>Psychrobacter maritimus strain 24d-<br>S2<br>Psychrobacter maritimus strain 16d-<br>S4 | MN758812.1<br>MN062085.1<br>MN062076.1 | 100<br>100<br>100    | 100<br>100<br>100 | Psychrobacter maritimus strain Pi2-20<br>Psychrobacter namhaensis strain SW-242<br>Psychrobacter namhaensis strain SW-242                                   | NR_027225.1<br>MW227500.1<br>NR_043141.1 | 99.8<br>99.5<br>99.1 | 100<br>100<br>100 | ON782598 |
| PG18-B | Gill | 766 | Rhodococcus sp. strain 2792<br>Rhodococcus yunnanensis strain<br>PAMC 27323                                                      | MT586011.1<br>MT555344.1               | 100<br>100           | 100<br>100<br>100 | Rhodococcus cerastii strain C5<br>Rhodococcus cercidiphylli strain YIM 65003                                                                                | NR_117103.1<br>NR_116275.1               | 99.1<br>99.1         | 100<br>100        | ON782599 |

|        |      |     |                                                                                                                                     |                                            |                       |                       |                                                                                                                                            |                                           |                      |                   |          |
|--------|------|-----|-------------------------------------------------------------------------------------------------------------------------------------|--------------------------------------------|-----------------------|-----------------------|--------------------------------------------------------------------------------------------------------------------------------------------|-------------------------------------------|----------------------|-------------------|----------|
|        |      |     | Rhodococcus yunnanensis strain PAMC 27319                                                                                           | MT555341.1                                 | 100                   |                       | Rhodococcus yunnanensis strain YIM 70056                                                                                                   | NR_043009.1                               | 99.1                 | 100               |          |
| PG19-B | Gill | 980 | Rhodococcus sp. FI 1025<br>Rhodococcus yunnanensis strain OsEnb_PLM_L24<br>Rhodococcus sp. strain O1                                | JQ691550.1<br>MN889263.1<br>MT012171.1     | 100<br>99.6<br>99.6   | 100<br>100<br>100     | Rhodococcus fascians strain CF17<br>Rhodococcus fascians strain ATCC 12974<br>Rhodococcus sovatisensis strain H004                         | NR_037021.1<br>NR_119126.1<br>NR_156055.1 | 99.2<br>99.0<br>99.0 | 100<br>100<br>100 | ON782600 |
| PG20-B | Gill | 772 | Bacillus licheniformis strain T-5-9-2<br><br>Bacillus licheniformis strain HBUAS664885<br>Bacillus licheniformis strain HBUAS664883 | ON331910.1<br><br>ON306832.1<br>ON306830.1 | 100<br><br>100<br>100 | 100<br><br>100<br>100 | Bacillus subtilis subsp. inaquosorum strain BGSC 3A28<br>Bacillus licheniformis strain DSM 13<br>Bacillus licheniformis strain ATCC 14580  | MK183752.1<br>MN396732.1<br>CP034569.1    | 100<br>100<br>100    | 100<br>100<br>100 | ON782601 |
| PG25-B | Gill | 850 | Rhodococcus sp. strain YF-9<br>Rhodococcus qingshengii strain cqsV23<br>Rhodococcus qingshengii strain cqsV7                        | MT631993.1<br>MN826591.1<br>MN826576.1     | 100<br>100<br>100     | 100<br>100<br>100     | Rhodococcus erythropolis strain: JCM 3201<br>Rhodococcus erythropolis strain DSM 43066<br>Nocardia coeliaca strain DSM 44595               | AB429553.1<br>KJ476725.1<br>NR_104776.1   | 100<br>100<br>100    | 100<br>100<br>100 | ON782602 |
| PG26-B | Gill | 820 | Rhodococcus sp. strain 23770<br>Rhodococcus sp. strain PN2-B08P5-12<br>Rhodococcus sp. strain PN2-B07P1-10                          | MT357195.1<br>MK638437.1<br>MK638436.1     | 100<br>100<br>100     | 100<br>100<br>100     | Rhodococcus fascians strain CF17<br>Rhodococcus fascians strain ATCC 12974<br>Rhodococcus cerastii strain C5                               | NR_037021.1<br>NR_119126.1<br>NR_117103.1 | 100<br>99.8<br>99.6  | 100<br>100<br>100 | ON782603 |
| PG31-B | Gill | 540 | Rhodococcus sp. strain 2792<br><br>Rhodococcus yunnanensis strain PAMC 27323<br>Rhodococcus yunnanensis strain PAMC 27319           | MT586011.1<br><br>MT555344.1<br>MT555341.1 | 100<br><br>100<br>100 | 100<br><br>100<br>100 | Rhodococcus cercidiphylli strain: YIM 65003, clone: S1-903<br>Rhodococcus cerastii strain C5<br>Rhodococcus cercidiphylli strain YIM 65003 | LC130641.1<br>NR_117103.1<br>NR_116275.1  | 99.4<br>99.4<br>99.4 | 100<br>100<br>100 | ON782604 |
| PG32-B | Gill | 431 | Psychrobacter submarinus strain ACBC051<br>Psychrobacter submarinus strain QS172<br>Psychrobacter marincola strain QS123            | MK123477.1<br>MK439598.1<br>MK439597.1     | 100<br>100<br>100     | 100<br>100<br>100     | Psychrobacter maritimus strain Pi2-20<br>Psychrobacter submarinus strain KMM 225<br>Psychrobacter marincola strain KMM 277                 | NR_027225.1<br>NR_025457.1<br>NR_025458.1 | 100<br>100<br>99.8   | 100<br>100<br>100 | ON782605 |
| PG37-B | Gill | 645 | Psychrobacter maritimus strain JM52                                                                                                 | MN758812.1                                 | 100                   | 100                   | Psychrobacter maritimus strain Pi2-20                                                                                                      | NR_027225.1                               | 100                  | 100               | ON782606 |

|            |                    |     |                                                                                                                                            |                                         |                         |                   |                                                                                                                                                       |                                           |                         |                   |          |
|------------|--------------------|-----|--------------------------------------------------------------------------------------------------------------------------------------------|-----------------------------------------|-------------------------|-------------------|-------------------------------------------------------------------------------------------------------------------------------------------------------|-------------------------------------------|-------------------------|-------------------|----------|
|            |                    |     | Psychrobacter sp. strain RSAP27<br>Psychrobacter sp. strain RSAP9                                                                          | MH348992.1<br>MH348978.1                | 100<br>100              | 100<br>100        | Psychrobacter submarinus strain KMM 225<br>Psychrobacter marincola strain KMM 277                                                                     | NR_025457.1<br>NR_025458.1                | 100<br>100              | 99<br>98          |          |
| PG38-B     | Gill               | 440 | Psychrobacter sp. strain PL 19<br>Psychrobacter cryohalolentis strain 4_KNS_9_Sed_A2<br>Psychrobacter cryohalolentis strain 4_KNS_9_Sed_Z3 | MT594461.1<br>MT309525.1<br>MT309524.1  | 99.77<br>99.77<br>99.77 | 100<br>100<br>100 | Psychrobacter cryohalolentis K5<br>Psychrobacter arcticus strain 273-4<br>Psychrobacter okhotskensis strain MD17                                      | NR_075055.1<br>NR_075054.1<br>MW228834.1  | 99.77<br>99.77<br>99.77 | 100<br>100<br>100 | ON782607 |
| PG39-B     | Gill               | 406 | Bacterium strain 8WHB1<br>Brevundimonas sp. strain A1P056<br>Brevundimonas sp. strain E                                                    | MT318440.1<br>MN989045.1<br>MN722460.1  | 100<br>100<br>100       | 100<br>100<br>100 | Brevundimonas mediterranea strain V4.BO.10<br>Brevundimonas bullata strain HAMBI 262<br>Brevundimonas bullata strain IAM 13153(T)                     | NR_037108.1<br>LT899984.1<br>ON150872.1   | 100<br>99.5<br>99.5     | 100<br>100<br>100 | ON782608 |
| PG42-B     | Gill               | 841 | Dietzia alimentaria 72<br>Actinobacterium CH13i<br>Uncultured bacterium clone TSJG-5                                                       | NR_117306.1<br>FJ164056.1<br>KT905823.1 | 100<br>99.9<br>99.9     | 100<br>100<br>100 | Dietzia alimentaria 72<br>Dietzia maris strain DSM 43672<br>Dietzia maris strain DSM 43672                                                            | NR_117306.1<br>MW578396.1<br>NR_118596.1  | 100<br>99.5<br>99.5     | 100<br>100<br>100 | ON782609 |
| PG43-B     | Gill               | 645 | Microbacterium algeriense strain 10<br>Microbacterium oxydans strain PD3N6a<br>Microbacterium phyllosphaerae strain PD3N6                  | ON428502.1<br>ON406315.1<br>ON406314.1  | 100<br>100<br>100       | 100<br>100<br>100 | Microbacterium algeriense strain G1<br>Microbacterium phyllosphaerae strain DSM 13468 (T)<br>Microbacterium hydrocarbonoxydans strain NBRC 103074 (T) | MK480726.1<br>MK424292.1<br>MK424288.1    | 100<br>100<br>100       | 100<br>100<br>100 | ON782610 |
| MCC-PG1-B  | Gill               | 873 | Shewanella aestuarii strain Hal007<br>Shewanella aestuarii strain Hal006<br>Shewanella sp. AB411d                                          | MT406388.1<br>MT406387.1<br>FR821223.1  | 100<br>100<br>100       | 100<br>100<br>100 | Shewanella aestuarii strain JCM 17801<br>Shewanella aestuarii strain SC18<br>Shewanella glacialimarina strain TZS-4                                   | MT760375.1<br>NR_135728.1<br>CP041216.1   | 99.20<br>99.08<br>98.28 | 100<br>100<br>100 | ON782611 |
| MCC-PG2-B  | Gill               | 870 | Psychrobacter sp. strain RSAP9<br>Psychrobacter sp. strain RSAP27<br>Psychrobacter maritimus strain HM-2                                   | MH348978.1<br>MH348992.1<br>MH550141.1  | 100<br>100<br>100       | 100<br>99<br>99   | Psychrobacter maritimus strain Pi2-20<br>Psychrobacter namhaensis strain SW-242<br>Psychrobacter okhotskensis strain MD17                             | NR_027225.1<br>MW227500.1<br>MW228834.1   | 100<br>99.2<br>99.1     | 99<br>100<br>100  | ON782612 |
| PS3-B      | Stomach Epithelium | 450 | Unidentified marine bacterioplankton clone P3-4B_45<br>Psychrobacter sp. P11-S-4<br>Psychrobacter sp. strain PL 19                         | KC001357.1<br>EU016159.1<br>MT594461.1  | 95.33<br>95.33<br>95.11 | 100<br>100<br>100 | Psychrobacter cryohalolentis K5<br>Psychrobacter arcticus strain 273-4<br>Psychrobacter okhotskensis strain MD17                                      | NR_075055.1<br>NR_075054.1<br>MW228834.1  | 95.11<br>95.11<br>95.11 | 100<br>100<br>100 | ON782613 |
| MCC-PS2 -B | Stomach Epithelium | 722 | Photobacterium sp. strain TH13<br>Photobacterium sp. strain TH9<br>Photobacterium sp. strain TH8                                           | MN049756.1<br>MN049752.1<br>MN049751.1  | 100<br>100<br>100       | 100<br>100<br>100 | Photobacterium carnosum strain TMW 2.2021<br>Photobacterium phosphoreum strain NBRC 103031<br>Photobacterium aquimaris strain LC2-065                 | NR_156814.1<br>NR_114184.1<br>NR_041682.1 | 100<br>100<br>100       | 100<br>100<br>100 | ON782614 |
| PSD1-B     | Stomach Digesta    | 551 | Priestia megaterium strain Bme-BCI<br>Bacillus sp. (in: Bacteria) strain RBR43                                                             | ON544018.1<br>ON533692.1                | 100<br>100              | 100<br>100        | Bacillus acanthi strain L28<br>Bacillus aryabhatai B8W22                                                                                              | MT516450.1<br>MK503498.1                  | 100<br>100              | 100<br>100        | ON782615 |

|            |                      |     |                                           |            |       |     |                                               |             |       |     |          |
|------------|----------------------|-----|-------------------------------------------|------------|-------|-----|-----------------------------------------------|-------------|-------|-----|----------|
|            |                      |     | Priestia megaterium strain LM-44          | ON527364.1 | 100   | 100 | Bacillus megaterium strain ATCC 14581         | MK508856.1  | 100   | 100 |          |
| PSD2-B     | Stomach Digesta      | 685 | Shewanella putrefaciens strain S_T_TSA_82 | JX860531.1 | 99.85 | 100 | Shewanella putrefaciens strain ATCC 8071      | NR_119141.1 | 99.27 | 100 | ON782616 |
|            |                      |     | Shewanella sp. strain X99                 | MF152119.1 | 99.85 | 100 | Shewanella putrefaciens strain VTT E-95586    | KU321263.1  | 99.27 | 100 |          |
|            |                      |     | Shewanella sp. strain X94                 | MF152114.1 | 99.85 | 100 | Shewanella putrefaciens strain Hammer 95      | NR_044863.1 | 99.27 | 100 |          |
| PSD4-B     | Stomach Digesta      | 567 | Shewanella sp. strain 7-55                | MN945291.1 | 100   | 100 | Shewanella colwelliana strain ATCC 39565      | NR_043074.1 | 99.82 | 100 | ON782617 |
|            |                      |     | Shewanella colwelliana strain CeD-4       | MN220615.1 | 100   | 100 | Shewanella algidipiscicola strain NBRC 102032 | NR_114023.1 | 99.29 | 100 |          |
|            |                      |     | Shewanella colwelliana strain CeD-3       | MN220614.1 | 100   | 100 | Shewanella algidipiscicola strain S13         | NR_041297.1 | 99.29 | 100 |          |
| PSD5-B     | Stomach Digesta      | 901 | Vibrio anguillarum strain 2NS-PRS3-a2     | MG264177.1 | 100   | 100 | Vibrio qinghaiensis strain Q67                | CP022741.1  | 99.0  | 100 | ON782618 |
|            |                      |     | Vibrio anguillarum strain VIB12           | CP023310.1 | 100   | 100 | Vibrio anguillarum strain DSM 21597           | CP010084.1  | 99.0  | 100 |          |
|            |                      |     | Vibrio anguillarum strain VIB43           | CP023054.1 | 100   | 100 | Vibrio cortegadensis strain C 16.17           | NR_148247.1 | 99.0  | 100 |          |
| PSD6-B     | Stomach Digesta      | 909 | Psychrobacter alimentarius strain JM48    | MN758808.1 | 100   | 100 | Psychrobacter aquaticus strain CMS 56         | NR_042206.1 | 99.9  | 100 | ON782619 |
|            |                      |     | Psychrobacter alimentarius NGB-NV1        | LC512308.1 | 100   | 100 | Psychrobacter vallis strain CMS 39            | NR_042205.1 | 99.9  | 100 |          |
|            |                      |     | Psychrobacter alimentarius NGB-ISM2       | LC512280.1 | 100   | 100 | Psychrobacter alimentarius strain JG-100      | NR_025798.1 | 99.9  | 100 |          |
| PSD17-B    | Stomach Digesta      | 570 | Bacillus velezensis strain BN8.2          | CP097288.2 | 100   | 100 | Bacillus rugosus strain SPB7                  | MT554518.1  | 99.82 | 100 | ON782620 |
|            |                      |     | Bacillus sp. (in: Bacteria) strain ACZ06  | ON533599.1 | 99.82 | 100 | Bacillus subtilis subsp. subtilis str. 168    | CP053102.1  | 99.82 | 100 |          |
|            |                      |     | Bacillus subtilis strain KA16             | ON533518.1 | 99.82 | 100 | Bacillus tequilensis strain KCTC 13622        | MN543830.1  | 99.82 | 100 |          |
| MCC-PSD3-B | Stomach Digesta      | 873 | Shewanella aestuarii strain Hal007        | MT406388.1 | 100   | 100 | Shewanella aestuarii strain JCM 17801         | MT760375.1  | 99.20 | 100 | ON782621 |
|            |                      |     | Shewanella aestuarii strain Hal006        | MT406387.1 | 100   | 100 | Shewanella aestuarii strain SC18              | NR_135728.1 | 99.08 | 100 |          |
|            |                      |     | Shewanella sp. AB411d                     | FR821223.1 | 100   | 100 | Shewanella glacialimarina strain TZS-4        | CP041216.1  | 98.28 | 100 |          |
| PI1-B      | Intestine Epithelium | 480 | Bacillus sp. (in: Bacteria) strain A10    | MT590643.1 | 100   | 100 | Rossellomorea arthrocneimi strain EAR8        | MZ416782.1  | 100   | 100 | ON782622 |
|            |                      |     | Bacillus vietnamensis strain A6           | MT590649.1 | 100   | 100 | Bacillus vietnamensis strain 15-1             | MZ276305.1  | 100   | 100 |          |
|            |                      |     | Bacillus oryzaecorticis strain Y50-11     | MT585201.1 | 100   | 100 | Rossellomorea vietnamensis strain NBRC 101237 | NR_113995.1 | 100   | 100 |          |
| PI2-B      | Intestine Epithelium | 869 | Vibrio sp. VibC-Oc-072                    | KF577071.1 | 99.88 | 100 | Vibrio gigantis strain LGP 13                 | NR_044079.1 | 99.54 | 100 | ON782623 |
|            |                      |     | Vibrio sp. VibC-Oc-070                    | KF577070.1 | 99.88 | 100 | Vibrio crassostreae strain LGP 7              | NR_044078.1 | 99.54 | 100 |          |
|            |                      |     | Vibrio sp. VibC-Oc-034                    | KF577048.1 | 99.88 | 100 | Vibrio artabrorum strain VB 11.8              | NR_116068.1 | 99.42 | 100 |          |
| PI4-B      | Intestine Epithelium | 401 | Shewanella aestuarii strain Hal007        | MT406388.1 | 100   | 100 | Shewanella aestuarii strain SC18              | NR_135728.1 | 99.5  | 99  | ON782624 |
|            |                      |     | Shewanella aestuarii strain Hal006        | MT406387.1 | 100   | 100 | Shewanella aestuarii strain JCM 17801         | MT760375.1  | 99.5  | 99  |          |
|            |                      |     | Shewanella aestuarii strain Hal005        | MT406386.1 | 100   | 100 | Shewanella livingstonensis strain LMG 19866   | CP034015.1  | 99.0  | 100 |          |



|            |                      |     |                                               |            |       |     |                                                     |             |       |     |          |
|------------|----------------------|-----|-----------------------------------------------|------------|-------|-----|-----------------------------------------------------|-------------|-------|-----|----------|
| PI8-B      | Intestine Epithelium | 495 | Pseudoalteromonas sp. strain A8               | MT591289.1 | 100   | 100 | Pseudoalteromonas arctica A 37-1-2 chromosome II    | CP011026.1  | 100   | 100 | ON782625 |
|            |                      |     | Pseudoalteromonas sp. strain WN8              | MN889240.1 | 100   | 100 | Pseudoalteromonas arctica A 37-1-2 chromosome I     | CP011025.1  | 100   | 100 |          |
|            |                      |     | Pseudoalteromonas sp. strain WN6              | MN889238.1 | 100   | 100 | Pseudoalteromonas nigrifaciens strain KMM 661       | CP011036.1  | 100   | 100 |          |
| PID1-B     | Intestine Digesta    | 735 | Vibrio anguillarum strain 2NS-PRS3-a2         | MG264177.1 | 100   | 100 | Vibrio cyclitrophicus strain LMG 21359              | NR_115806.1 | 99.05 | 100 | ON782626 |
|            |                      |     | Vibrio anguillarum strain VIB12               | CP023310.1 | 100   | 100 | Vibrio mediterranei strain CECT 621                 | NR_117681.1 | 98.91 | 100 |          |
|            |                      |     | Vibrio anguillarum strain VIB43               | CP023054.1 | 100   | 100 | Vibrio pomeroyi strain CAIM 578                     | MT759944.1  | 98.91 | 100 |          |
| PID2-B     | Intestine Digesta    | 810 | Shewanella aestuarii strain Hal007            | MT406388.1 | 100   | 100 | Shewanella aestuarii strain JCM 17801               | MT760375.1  | 99.4  | 100 | ON782627 |
|            |                      |     | Shewanella aestuarii strain Hal006            | MT406387.1 | 100   | 100 | Shewanella aestuarii strain SC18x                   | NR_135728.1 | 99.3  | 100 |          |
|            |                      |     | Shewanella sp. AB411d                         | FR821223.1 | 100   | 100 | Shewanella gaetbuli strain TF-27                    | NR_135728.1 | 99.3  | 100 |          |
| PID3-B     | Intestine Digesta    | 608 | Photobacterium frigidophilum strain QS227     | MK439553.1 | 100   | 100 | Photobacterium carnosum strain TMW 2.2021           | NR_156814.1 | 100   | 100 | ON782628 |
|            |                      |     | Photobacterium sp. strain BOSW.4.10.32        | MN960543.1 | 100   | 100 | Photobacterium phosphoreum strain NBRC 103031       | NR_114184.1 | 100   | 100 |          |
|            |                      |     | Photobacterium sp. strain TH13                | MN049756.1 | 100   | 100 | Photobacterium aquimaris strain LC2-065             | NR_041682.1 | 100   | 100 |          |
| PID4-B     | Intestine Digesta    | 588 | Vibrio sp. strain GBPx3                       | MK560194.1 | 100   | 100 | Vibrio qinghaiensis strain Q67                      | CP022741.1  | 99.8  | 100 | ON782629 |
|            |                      |     | Vibrio anguillarum strain 90-11-286           | CP011460.1 | 100   | 100 | Vibrio anguillarum strain DSM 21597                 | CP010084.1  | 99.2  | 100 |          |
|            |                      |     | Vibrio metschnikovii strain ST4               | KJ486283.1 | 100   | 100 | Vibrio metschnikovii strain NBRC 103153             | NR_114220.1 | 99.2  | 100 |          |
| PID12-B    | Intestine Digesta    | 749 | Vibrio aestuarianus strain 15_075_1T2         | MK307696.1 | 100   | 100 | Vibrio aestuarianus subsp. cardii strain 12/122 3T3 | MK307684.1  | 100   | 100 | ON782630 |
|            |                      |     | Vibrio aestuarianus strain 15_064_4T2         | MK307695.1 | 100   | 100 | Vibrio aestuarianus strain NBRC 15629               | NR_113780.1 | 100   | 100 |          |
|            |                      |     | Vibrio aestuarianus strain 15_061_5T2         | MK307693.1 | 100   | 100 | Vibrio aestuarianus strain CAIM 592                 | MT759936.1  | 100   | 100 |          |
| PID21-B    | Intestine Digesta    | 560 | Bacillus pumilus strain BST3                  | ON533488.1 | 99.82 | 100 | Bacillus aerophilus strain 28K                      | MN845151.1  | 99.82 | 100 | ON782631 |
|            |                      |     | Bacillus safensis strain BLXSC                | CP034414.1 | 99.82 | 100 | Bacillus altitudinis 41KF2b                         | MN840036.1  | 99.82 | 100 |          |
|            |                      |     | Bacillus stratosphericus strain NRSSBBSTRAT-1 | ON520739.1 | 99.82 | 100 | Bacillus aerius strain 24K                          | MN200939.1  | 99.82 | 100 |          |
| MCC-PID1-B | Intestine Digesta    | 814 | Photobacterium phosphoreum strain 16LGm78     | MK648254.1 | 100   | 100 | Photobacterium carnosum strain TMW 2.2021           | NR_156814.1 | 100   | 100 | ON782632 |
|            |                      |     | Photobacterium phosphoreum strain 15LGm78     | MK641668.1 | 100   | 100 | Photobacterium phosphoreum strain NBRC 103031       | NR_114184.1 | 100   | 100 |          |
|            |                      |     | Photobacterium phosphoreum strain 9LMs78      | MK641523.1 | 100   | 100 | Photobacterium piscicola strain NCCB 100098         | NR_125679.1 | 99.8  | 100 |          |

|       |       |     |                                                                                                                            |                                         |                         |                   |                                                                                                                                                                               |                                           |                         |                   |          |
|-------|-------|-----|----------------------------------------------------------------------------------------------------------------------------|-----------------------------------------|-------------------------|-------------------|-------------------------------------------------------------------------------------------------------------------------------------------------------------------------------|-------------------------------------------|-------------------------|-------------------|----------|
| W1-B  | Water | 519 | Vibrio sp. strain CLE137<br>Vibrio sp. strain AEM-CIFE3 2012<br>Vibrio anguillarum K4 gene                                 | MN931898.1<br>MK954131.1<br>LC475108.1  | 100<br>100<br>100       | 100<br>100<br>100 | Vibrio qinghaiensis strain Q67<br>Vibrio anguillarum strain DSM 21597<br>Vibrio anguillarum strain NBRC 13266                                                                 | CP022741.1<br>CP010084.1<br>NR_113609.1   | 100<br>100<br>100       | 100<br>100<br>100 | ON782633 |
| W2-B  | Water | 762 | Psychrobacter sp. strain TH18<br>Psychrobacter sp. strain TH16<br>Psychrobacter sp. strain BH36                            | MN049761.1<br>MN049759.1<br>MN049674.1  | 99.87<br>99.87<br>99.87 | 100<br>100<br>100 | Psychrobacter piscatorii strain T-3-2<br>Psychrobacter nivimaris strain 88/2-7<br>Psychrobacter muriicola strain 2pS                                                          | NR_112807.1<br>NR_028948.1<br>NR_114669.1 | 99.87<br>99.87<br>99.74 | 100<br>100<br>100 | ON782634 |
| W3-B  | Water | 672 | Staphylococcus saprophyticus strain UTI-045<br>Staphylococcus edaphicus strain 2202<br>Staphylococcus edaphicus strain 674 | CP054831.1<br>MT604700.1<br>MT585436.1  | 100<br>100<br>100       | 100<br>100<br>100 | Staphylococcus succinus subsp. succinus strain DSM 14617<br>Staphylococcus succinus subsp. casei strain DSM 15096<br>Staphylococcus succinus subsp. succinus strain DSM 14617 | MF678969.1<br>MF678968.1<br>MF678913.1    | 100<br>100<br>100       | 100<br>100<br>100 | ON782635 |
| W4-B  | Water | 786 | Planococcus sp. IE3-4<br>Planococcus donghaensis strain DSM 22276<br>Planococcus donghaensis strain IARI-CDK 21            | EF105393.1<br>CP016543.2<br>KT441070.1  | 100<br>99.8<br>99.6     | 100<br>100<br>100 | Planococcus donghaensis strain DSM 22276<br>Planococcus donghaensis strain JH1<br>Planococcus donghaensis strain DSM 22276                                                    | CP016543.2<br>NR_044073.1<br>CP016544.1   | 99.8<br>99.6<br>99.5    | 100<br>100<br>100 | ON782636 |
| W5-B  | Water | 833 | Bizionia hallyeonensis strain T-y7<br>Bizionia sp. M204<br>Bizionia sp. EM20                                               | NR_109525.1<br>CP046242.1<br>GQ331110.1 | 100<br>99.9<br>99.8     | 100<br>100<br>100 | Bizionia hallyeonensis strain T-y7<br>Bizionia echini strain KMM 6177<br>Bizionia algorithergicola strain APA-1                                                               | NR_109525.1<br>NR_116780.1<br>NR_043122.1 | 100<br>99.4<br>99.2     | 100<br>100<br>99  | ON782637 |
| W6-B  | Water | 880 | Vibrio anguillarum strain MHK3<br>Vibrio anguillarum strain CNEVA NB11008<br>Vibrio anguillarum strain B26-1               | CP022468.1<br>CP022103.1<br>KJ028214.1  | 100<br>100<br>100       | 100<br>100<br>100 | Vibrio qinghaiensis strain Q67<br>Vibrio anguillarum strain DSM 21597<br>Vibrio cortegadensis strain C 16.17                                                                  | CP022741.1<br>CP010084.1<br>NR_148247.1   | 98.9<br>98.9<br>98.9    | 100<br>100<br>100 | ON782638 |
| W10-B | Water | 768 | Arthrobacter echini isolate SW_2_206<br>Arthrobacter sp. strain AHE_PA_123<br>Arthrobacter sp. BB77                        | LR722945.1<br>MW580075.1<br>FR693359.1  | 100<br>100<br>100       | 99<br>99<br>99    | Arthrobacter echini strain AM23<br>Arthrobacter ruber strain MDB1-42<br>Arthrobacter bussei strain KR32                                                                       | NR_148833.1<br>MW227493.1<br>NR_170399.1  | 99.9<br>99.6<br>99.6    | 99<br>100<br>99   | ON782639 |
| W11-B | Water | 698 | Shewanella pealeana strain GSS<br>Shewanella pneumatophori isolate Q66<br>Shewanella sp. strain P8E-5                      | MN443612.1<br>LS482990.1<br>KX898880.1  | 99.86<br>99.71<br>99.71 | 100<br>100<br>100 | Shewanella halifaxensis HAW-EB4<br>Shewanella pealeana strain ATCC 700345<br>Shewanella halifaxensis HAW-EB4                                                                  | NR_074822.1<br>NR_074821.1<br>CP000931.1  | 99.71<br>99.71<br>99.71 | 100<br>100<br>100 | ON782640 |
| W12-B | Water | 855 | Rhodococcus sp. strain 23770<br>Rhodococcus sp. strain Bj13<br>Rhodococcus sp. strain ao1                                  | MT357195.1<br>MT012186.1<br>MT012179.1  | 100<br>100<br>100       | 100<br>100<br>100 | Rhodococcus fascians strain CF17<br>Rhodococcus fascians strain ATCC 12974<br>Rhodococcus cerastii strain C5                                                                  | NR_037021.1<br>NR_119126.1<br>NR_117103.1 | 100<br>99.8<br>99.7     | 100<br>100<br>100 | ON782641 |

|          |                      |     |                                                                                                                                                                                                                    |                                        |                         |                   |                                                                                                                                           |                                           |                         |                   |          |
|----------|----------------------|-----|--------------------------------------------------------------------------------------------------------------------------------------------------------------------------------------------------------------------|----------------------------------------|-------------------------|-------------------|-------------------------------------------------------------------------------------------------------------------------------------------|-------------------------------------------|-------------------------|-------------------|----------|
| W13-B    | Water                | 565 | Rhodococcus sp. strain 2b<br>Rhodococcus sp. strain 23770<br>Rhodococcus fascians strain VL_2051H                                                                                                                  | MT484139.1<br>MT357195.1<br>MT328751.1 | 100<br>100<br>100       | 100<br>100<br>100 | Rhodococcus fascians strain CF17<br>Rhodococcus fascians strain ATCC 12974<br>Rhodococcus cerastii strain C5                              | NR_037021.1<br>NR_119126.1<br>NR_117103.1 | 100<br>99.7<br>99.5     | 100<br>100<br>100 | ON782642 |
| MCC-W1-B | Water                | 374 | Shewanella kaireitica isolate R2A112_3_15<br>Shewanella sp. strain M20<br>Shewanella sp. strain Arc7-214                                                                                                           | LR722823.1<br>MN049695.1<br>MN784326.1 | 100<br>100<br>100       | 100<br>100<br>100 | Shewanella halifaxensis HAW-EB4<br>Shewanella pealeana strain ATCC 700345<br>Shewanella halifaxensis HAW-EB4                              | NR_074822.1<br>NR_074821.1<br>CP000931.1  | 100<br>100<br>100       | 100<br>100<br>100 | ON782643 |
| PG36-F   | Gill                 | 515 | Inopinatum lactosum strain OUCMBIII101025<br>Uncultured fungus clone ZBJ201205-13<br>Hyphozyma variabilis strain CNRMA12.453 isolate ISHAM-ITS_ID MITS2000                                                         | HQ914907.1<br>KX514814.1<br>KP132305.1 | 99.81<br>99.81<br>99.81 | 100<br>100<br>100 | Inopinatum lactosum CCY 19-21-1 TYPE<br>Inopinatum lactosum isolate D. Haelew. F-3088a<br>Inopinatum lactosum isolate D. Haelew. F-3088b  | NR_174911.1<br>MW471139.1<br>MW471140.1   | 100<br>100<br>100       | 100<br>100<br>100 | ON791469 |
| PSD10-F  | Stomach Digesta      | 440 | Trichoderma harzianum isolate MT2<br>Trichoderma harzianum isolate MT1<br>Trichoderma lixii strain F-2                                                                                                             | MT577837.1<br>MT577649.1<br>MT434003.1 | 100<br>100<br>100       | 100<br>100<br>100 | Trichoderma lixii CBS 110080<br>Trichoderma asiaticum strain YMF1.00352<br>Trichoderma atrobrunneum CBS 548.92                            | NR_131264.1<br>MH113930.1<br>NR_137298.1  | 99.5<br>99.3<br>99.3    | 100<br>99<br>99   | ON791470 |
| PSD14-F  | Stomach Digesta      | 423 | Chromocleista sp. voucher research collection Farrer lab 27<br>Paraconiothyrium cyclothyrioides voucher research collection Farrer lab 191<br>Fusarium sporotrichioides voucher research collection Farrer lab 169 | MN644791.1<br>MN644673.1<br>MN644658.1 | 100<br>100<br>100       | 100<br>100<br>100 | Thyridium curvatum CBS 490.82 TYPE<br>Thyridium flavostromatum MAFF 247509 TYPE<br>Thyridium limonesiae CBS 146752 TYPE                   | NR_132076.1<br>NR_175611.1<br>NR_172355.1 | 99.29<br>99.05<br>98.35 | 100<br>100<br>100 | ON791471 |
| PI9-F    | Intestine Epithelium | 414 | Aureobasidium pullulans isolate 21_3<br>Uncultured fungus clone 4248_662<br>Fungal sp. strain MP4S16                                                                                                               | MT363099.1<br>MT236651.1<br>MT112993.1 | 100<br>100<br>100       | 100<br>100<br>100 | Aureobasidium pullulans strain CBS 584.75<br>Aureobasidium lini strain CBS 125.21<br>Aureobasidium melanogenum CBS 105.22                 | KT693733.1<br>MH854694.1<br>NR_159598.1   | 100<br>98.8<br>98.1     | 97<br>99<br>100   | ON791472 |
| PID1-F   | Intestine Digesta    | 573 | Rhizopus microsporus strain 1M5<br>Rhizopus microsporus isolate 4<br>Rhizopus microsporus isolate GL58                                                                                                             | MT620751.1<br>MT590587.1<br>MT590579.1 | 100<br>100<br>100       | 100<br>100<br>100 | Rhizopus azygosporus strain CBS 357.93<br>Rhizopus microsporus var. chinensis strain CBS 631.82<br>Rhizopus azygosporus strain CBS 357.93 | DQ119008.1<br>MH861534.1<br>MH862419.1    | 100<br>100<br>99.8      | 100<br>99<br>100  | ON791473 |
| PID20-F  | Gut Digesta          | 437 | Fusarium sporotrichioides voucher research collection Farrer lab 169<br>Pleosporales sp. voucher research                                                                                                          | MN644658.1<br>MN644655.1               | 100<br>100              | 100<br>100        | Phialemoniopsis curvata strain: CBS 490.82<br>Thyridium curvatum CBS 490.82                                                               | AB278180.1<br>NR_132076.1                 | 99.1<br>99.1            | 100<br>97         | ON791474 |

|      |       |     |                                                            |            |     |     |                                           |             |      |     |          |
|------|-------|-----|------------------------------------------------------------|------------|-----|-----|-------------------------------------------|-------------|------|-----|----------|
|      |       |     | collection Farrer lab 166<br>Phialemonium sp. 7/S/Pa/1/5/2 | JX040769.1 | 100 | 100 | Thyridium flavostromatum KT 3891          | LC655959.1  | 98.8 | 97  |          |
| W9-F | Water | 353 | Penicillium antarcticum isolate<br>CNUFC-RD48              | MK390492.1 | 100 | 100 | Penicillium antarcticum strain CBS 100492 | MH862703.1  | 100  | 100 | ON791475 |
|      |       |     | Penicillium sp. isolate CLE41                              | MN544011.1 | 100 | 100 | Penicillium atrovenetum strain CBS 241.56 | MH857605.1  | 99.7 | 100 |          |
|      |       |     | Penicillium sp. isolate CLE177                             | MN544008.1 | 100 | 100 | Penicillium atrovenetum NRRL 2571         | NR_121255.1 | 99.7 | 100 |          |

**Table S2.** Taxonomic identification of 66 microbial strains isolated from European plaice and the seawater reference to the highest possible level based on BLAST comparison to the NCBI nucleotide database (BLAST performed on June 13, 2022). Isolate codes: **PG:** Plaice Gut, **PS:** Plaice Stomach, **PSD:** Plaice Stomach Digesta, **PI:** Plaice Intestine Epithelium, **PID:** Plaice Intestine Digesta, **W:** Water reference, **MCC:** Isolation on Microchip using Fish Medium. Isolation medium abbreviations: **WSP:** modified Wickerham medium, **TSB:** Trypticase Soy Broth, **FM:** Fish Medium, **PDA:** Potato Dextrose Agar.

| Strain ID | Source | Kingdom  | Phylum         | Class               | Order            | Family            | Genus                   | Species             | Isolation Medium |
|-----------|--------|----------|----------------|---------------------|------------------|-------------------|-------------------------|---------------------|------------------|
| PG1-B     | Gill   | Bacteria | Proteobacteria | Gammaproteobacteria | Alteromonadales  | Shewanellaceae    | <i>Shewanella</i>       | <i>baltica</i>      | WSP              |
| PG2-B     | Gill   | Bacteria | Proteobacteria | Gammaproteobacteria | Vibrionales      | Vibrionaceae      | <i>Vibrio</i>           | <i>anguillarum</i>  | WSP              |
| PG4-B     | Gill   | Bacteria | Proteobacteria | Gammaproteobacteria | Vibrionales      | Vibrionaceae      | <i>Photobacterium</i>   | sp.                 | WSP              |
| PG5-B     | Gill   | Bacteria | Proteobacteria | Gammaproteobacteria | Pseudomonadales  | Moraxellaceae     | <i>Psychrobacter</i>    | sp.                 | WSP              |
| PG6-B     | Gill   | Bacteria | Proteobacteria | Gammaproteobacteria | Pseudomonadales  | Moraxellaceae     | <i>Psychrobacter</i>    | sp.                 | TSB              |
| PG8-B     | Gill   | Bacteria | Proteobacteria | Gammaproteobacteria | Pseudomonadales  | Moraxellaceae     | <i>Psychrobacter</i>    | sp.                 | TSB              |
| PG9-B     | Gill   | Bacteria | Proteobacteria | Gammaproteobacteria | Pseudomonadales  | Moraxellaceae     | <i>Psychrobacter</i>    | sp.                 | TSB              |
| PG10-B    | Gill   | Bacteria | Bacteroidetes  | Flavobacteriia      | Flavobacteriales | Weeksellaceae     | <i>Chryseobacterium</i> | <i>carnis</i>       | TSB              |
| PG11-B    | Gill   | Bacteria | Actinomycetota | Actinobacteria      | Micrococcales    | Microbacteriaceae | <i>Microbacterium</i>   | sp.                 | TSB              |
| PG12-B    | Gill   | Bacteria | Proteobacteria | Gammaproteobacteria | Vibrionales      | Vibrionaceae      | <i>Vibrio</i>           | <i>aestuarianus</i> | TSB              |
| PG14-B    | Gill   | Bacteria | Proteobacteria | Gammaproteobacteria | Pseudomonadales  | Moraxellaceae     | <i>Psychrobacter</i>    | <i>maritimus</i>    | TSB              |
| PG15-B    | Gill   | Bacteria | Proteobacteria | Gammaproteobacteria | Lysobacterales   | Lysobacteraceae   | <i>Stenotrophomonas</i> | sp.                 | PDA              |
| PG16-B    | Gill   | Bacteria | Actinomycetota | Actinobacteria      | Mycobacteriales  | Nocardiaceae      | <i>Rhodococcus</i>      | sp.                 | PDA              |
| PG17-B    | Gill   | Bacteria | Proteobacteria | Gammaproteobacteria | Pseudomonadales  | Moraxellaceae     | <i>Psychrobacter</i>    | <i>maritimus</i>    | WSP              |
| PG18-B    | Gill   | Bacteria | Actinomycetota | Actinobacteria      | Mycobacteriales  | Nocardiaceae      | <i>Rhodococcus</i>      | sp.                 | WSP              |
| PG19-B    | Gill   | Bacteria | Actinomycetota | Actinobacteria      | Mycobacteriales  | Nocardiaceae      | <i>Rhodococcus</i>      | sp.                 | WSP              |
| PG20-B    | Gill   | Bacteria | Firmicutes     | Bacilli             | Caryophanales    | Bacillaceae       | <i>Bacillus</i>         | sp.                 | TSB              |
| PG25-B    | Gill   | Bacteria | Actinomycetota | Actinobacteria      | Mycobacteriales  | Nocardiaceae      | <i>Rhodococcus</i>      | sp.                 | TSB              |
| PG26-B    | Gill   | Bacteria | Actinomycetota | Actinobacteria      | Mycobacteriales  | Nocardiaceae      | <i>Rhodococcus</i>      | sp.                 | TSB              |
| PG31-B    | Gill   | Bacteria | Actinomycetota | Actinobacteria      | Mycobacteriales  | Nocardiaceae      | <i>Rhodococcus</i>      | sp.                 | TSB              |
| PG32-B    | Gill   | Bacteria | Proteobacteria | Gammaproteobacteria | Pseudomonadales  | Moraxellaceae     | <i>Psychrobacter</i>    | sp.                 | WSP              |

|            |                      |          |                |                     |                 |                        |                          |                     |     |
|------------|----------------------|----------|----------------|---------------------|-----------------|------------------------|--------------------------|---------------------|-----|
| PG37-B     | Gill                 | Bacteria | Proteobacteria | Gammaproteobacteria | Pseudomonadales | Moraxellaceae          | <i>Psychrobacter</i>     | sp.                 | TSB |
| PG38-B     | Gill                 | Bacteria | Proteobacteria | Gammaproteobacteria | Pseudomonadales | Moraxellaceae          | <i>Psychrobacter</i>     | sp.                 | TSB |
| PG39-B     | Gill                 | Bacteria | Proteobacteria | Alphaproteobacteria | Caulobacterales | Caulobacteraceae       | <i>Brevundimonas</i>     | <i>mediterranea</i> | WSP |
| PG42-B     | Gill                 | Bacteria | Actinomycetota | Actinobacteria      | Mycobacteriales | Dietziaceae            | <i>Dietzia</i>           | <i>alimentaria</i>  | WSP |
| PG43-B     | Gill                 | Bacteria | Actinomycetota | Actinobacteria      | Micrococcales   | Microbacteriaceae      | <i>Microbacterium</i>    | sp.                 | TSB |
| MCC-PG1-B  | Gill                 | Bacteria | Proteobacteria | Gammaproteobacteria | Alteromonadales | Shewanellaceae         | <i>Shewanella</i>        | sp.                 | FM  |
| MCC-PG2-B  | Gill                 | Bacteria | Proteobacteria | Gammaproteobacteria | Pseudomonadales | Moraxellaceae          | <i>Psychrobacter</i>     | <i>maritimus</i>    | FM  |
| PS3-B      | Stomach Epithelium   | Bacteria | Proteobacteria | Gammaproteobacteria | Pseudomonadales | Moraxellaceae          | <i>Psychrobacter</i>     | sp.                 | TSB |
| MCC-PS2 -B | Stomach Epithelium   | Bacteria | Proteobacteria | Gammaproteobacteria | Vibrionales     | Vibrionaceae           | <i>Photobacterium</i>    | sp.                 | FM  |
| PSD1-B     | Stomach Digesta      | Bacteria | Firmicutes     | Bacilli             | Caryophanales   | Bacillaceae            | <i>Bacillus</i>          | sp.                 | TSB |
| PSD2-B     | Stomach Digesta      | Bacteria | Proteobacteria | Gammaproteobacteria | Alteromonadales | Shewanellaceae         | <i>Shewanella</i>        | sp.                 | TSB |
| PSD4-B     | Stomach Digesta      | Bacteria | Proteobacteria | Gammaproteobacteria | Alteromonadales | Shewanellaceae         | <i>Shewanella</i>        | <i>colwelliana</i>  | TSB |
| PSD5-B     | Stomach Digesta      | Bacteria | Proteobacteria | Gammaproteobacteria | Vibrionales     | Vibrionaceae           | <i>Vibrio</i>            | sp.                 | TSB |
| PSD6-B     | Stomach Digesta      | Bacteria | Proteobacteria | Gammaproteobacteria | Pseudomonadales | Moraxellaceae          | <i>Psychrobacter</i>     | <i>alimentarius</i> | TSB |
| PSD17-B    | Stomach Digesta      | Bacteria | Firmicutes     | Bacilli             | Caryophanales   | Bacillaceae            | <i>Bacillus</i>          | <i>velezensis</i>   | TSB |
| MCC-PSD3-B | Stomach Digesta      | Bacteria | Proteobacteria | Gammaproteobacteria | Alteromonadales | Shewanellaceae         | <i>Shewanella</i>        | <i>aestuarii</i>    | FM  |
| PI1-B      | Intestine Epithelium | Bacteria | Firmicutes     | Bacilli             | Caryophanales   | Bacillaceae            | <i>Bacillus</i>          | sp.                 | TSB |
| PI2-B      | Intestine Epithelium | Bacteria | Proteobacteria | Gammaproteobacteria | Vibrionales     | Vibrionaceae           | <i>Vibrio</i>            | sp.                 | TSB |
| PI4-B      | Intestine Epithelium | Bacteria | Proteobacteria | Gammaproteobacteria | Alteromonadales | Shewanellaceae         | <i>Shewanella</i>        | <i>aestuarii</i>    | WSP |
| PI8-B      | Intestine Epithelium | Bacteria | Proteobacteria | Gammaproteobacteria | Alteromonadales | Pseudoalteromonadaceae | <i>Pseudoalteromonas</i> | sp.                 | WSP |

|            |                      |          |                |                     |                  |                    |                       |                      |     |
|------------|----------------------|----------|----------------|---------------------|------------------|--------------------|-----------------------|----------------------|-----|
| PID1-B     | Intestine Digesta    | Bacteria | Proteobacteria | Gammaproteobacteria | Vibrionales      | Vibrionaceae       | <i>Vibrio</i>         | <i>anguillarum</i>   | TSB |
| PID2-B     | Intestine Digesta    | Bacteria | Proteobacteria | Gammaproteobacteria | Alteromonadales  | Shewanellaceae     | <i>Shewanella</i>     | <i>aestuarii</i>     | TSB |
| PID3-B     | Intestine Digesta    | Bacteria | Proteobacteria | Gammaproteobacteria | Vibrionales      | Vibrionaceae       | <i>Photobacterium</i> | sp.                  | TSB |
| PID4-B     | Intestine Digesta    | Bacteria | Proteobacteria | Gammaproteobacteria | Vibrionales      | Vibrionaceae       | <i>Vibrio</i>         | sp.                  | WSP |
| PID12-B    | Intestine Digesta    | Bacteria | Proteobacteria | Gammaproteobacteria | Vibrionales      | Vibrionaceae       | <i>Vibrio</i>         | <i>aestuarianus</i>  | TSB |
| PID21-B    | Intestine Digesta    | Bacteria | Firmicutes     | Bacilli             | Caryophanales    | Bacillaceae        | <i>Bacillus</i>       | sp.                  | TSB |
| MCC-PID1-B | Intestine Digesta    | Bacteria | Proteobacteria | Gammaproteobacteria | Vibrionales      | Vibrionaceae       | <i>Photobacterium</i> | sp.                  | FM  |
| W1-B       | Water                | Bacteria | Proteobacteria | Gammaproteobacteria | Vibrionales      | Vibrionaceae       | <i>Vibrio</i>         | sp.                  | TSB |
| W2-B       | Water                | Bacteria | Proteobacteria | Gammaproteobacteria | Pseudomonadales  | Moraxellaceae      | <i>Psychrobacter</i>  | sp.                  | TSB |
| W3-B       | Water                | Bacteria | Firmicutes     | Bacilli             | Caryophanales    | Staphylococcaceae  | <i>Staphylococcus</i> | sp.                  | TSB |
| W4-B       | Water                | Bacteria | Firmicutes     | Bacilli             | Caryophanales    | Caryophanaceae     | <i>Planococcus</i>    | <i>donghaensis</i>   | TSB |
| W5-B       | Water                | Bacteria | Bacteroidetes  | Flavobacteriia      | Flavobacteriales | Flavobacteriaceae  | <i>Bizionia</i>       | <i>hallyeonensis</i> | TSB |
| W6-B       | Water                | Bacteria | Proteobacteria | Gammaproteobacteria | Vibrionales      | Vibrionaceae       | <i>Vibrio</i>         | sp.                  | WSP |
| W10-B      | Water                | Bacteria | Actinomycetota | Actinobacteria      | Micrococcales    | Micrococcaceae     | <i>Arthrobacter</i>   | <i>echini</i>        | TSB |
| W11-B      | Water                | Bacteria | Proteobacteria | Gammaproteobacteria | Alteromonadales  | Shewanellaceae     | <i>Shewanella</i>     | <i>pealeana</i>      | TSB |
| W12-B      | Water                | Bacteria | Actinomycetota | Actinobacteria      | Mycobacteriales  | Nocardiaceae       | <i>Rhodococcus</i>    | sp.                  | PDA |
| W13-B      | Water                | Bacteria | Actinomycetota | Actinobacteria      | Mycobacteriales  | Nocardiaceae       | <i>Rhodococcus</i>    | <i>fascians</i>      | PDA |
| MCC-W1-B   | Water                | Bacteria | Proteobacteria | Gammaproteobacteria | Alteromonadales  | Shewanellaceae     | <i>Shewanella</i>     | sp.                  | FM  |
| PG36-F     | Gill                 | Fungi    | Ascomycota     | Leotiomyces         | incertae sedis   | incertae sedis     | incertae sedis        | n/a                  | WSP |
| PSD10-F    | Stomach Digesta      | Fungi    | Ascomycota     | Sordariomycetes     | Hypocreales      | Hypocreaceae       | <i>Trichoderma</i>    | sp.                  | WSP |
| PSD14-F    | Stomach Digesta      | Fungi    | Ascomycota     | Sordariomycetes     | incertae sedis   | incertae sedis     | incertae sedis        | n/a                  | WSP |
| PI9-F      | Intestine Epithelium | Fungi    | Ascomycota     | Dothideomycetes     | Dothideales      | Saccharotheciaceae | <i>Aureobasidium</i>  | <i>pullulans</i>     | PDA |

|         |                      |       |              |                 |                |                |                    |                    |     |
|---------|----------------------|-------|--------------|-----------------|----------------|----------------|--------------------|--------------------|-----|
| PID1-F  | Intestine<br>Digesta | Fungi | Mucoromycota | Mucoromycetes   | Mucorales      | Mucoraceae     | <i>Rhizopus</i>    | sp.                | PDA |
| PID20-F | Intestine<br>Digesta | Fungi | Ascomycota   | Sordariomycetes | incertae sedis | incertae sedis | incertae sedis     | n/a                | PDA |
| W9-F    | Water                | Fungi | Ascomycota   | Eurotiomycetes  | Eurotiales     | Aspergillaceae | <i>Penicillium</i> | <i>antarcticum</i> | PDA |



**Table S3.** Biological activity of all 23 selected plaice-associated microorganisms. n.g. No growth. Vi: *V. ichthyenteri*. Lg: *Lactococcus garvieae*, MRSA: Methillicin-resistant *Staphylococcus aureus*, Ef: *Enterococcus faecium*. Positive controls: Chloramphenicol (Vi and MRSA), Ampicillin (Lg and Ef).

| Code   | Taxonomical ID                    | Origin                    | Medium - regime | Vi    | Lg    | MRSA  | Ef    |
|--------|-----------------------------------|---------------------------|-----------------|-------|-------|-------|-------|
| PG1-B  | <i>Shewanella baltica</i>         | Gill                      | MA solid        | > 100 | > 100 | 20.2  | 26.4  |
|        |                                   |                           | MB liquid       | > 100 | 41.7  | 18.8  | 8.8   |
| PG10-B | <i>Chryseobacterium carnis</i>    | Gill                      | MA solid        | 18.6  | > 100 | 39.0  | 41.9  |
|        |                                   |                           | MB liquid       | n.c.  | > 100 | n.c.  | 51.0  |
| PG11-B | <i>Microbacterium</i> sp.         | Gill                      | MA solid        | > 100 | > 100 | 45.9  | 86.6  |
|        |                                   |                           | MB liquid       | 5.7   | > 100 | > 100 | > 100 |
| PG12-B | <i>Vibrio aestuarianus</i>        | Gill                      | MA solid        | 17.2  | 27.8  | 19.1  | 34.4  |
|        |                                   |                           | MB liquid       | 43.9  | > 100 | 61.0  | 43.4  |
| PG19-B | <i>Rhodococcus</i> sp.            | Gill                      | MA solid        | > 100 | > 100 | > 100 | > 100 |
|        |                                   |                           | MB liquid       | > 100 | > 100 | > 100 | > 100 |
| PG20-B | <i>Bacillus</i> sp.               | Gill                      | MA solid        | > 100 | > 100 | > 100 | > 100 |
|        |                                   |                           | MB liquid       | > 100 | > 100 | > 100 | > 100 |
| PG25-B | <i>Rhodococcus</i> sp             | Gill                      | MA solid        | > 100 | > 100 | > 100 | > 100 |
|        |                                   |                           | MB liquid       | > 100 | > 100 | > 100 | > 100 |
| PG26-B | <i>Rhodococcus</i> sp             | Gill                      | MA solid        | > 100 | > 100 | > 100 | > 100 |
|        |                                   |                           | MB liquid       | > 100 | > 100 | > 100 | > 100 |
| PG31-B | <i>Rhodococcus</i> sp             | Gill                      | MA solid        | > 100 | > 100 | > 100 | > 100 |
|        |                                   |                           | MB liquid       | > 100 | > 100 | > 100 | > 100 |
| PG8-B  | <i>Psychrobacter</i> sp.          | Gill                      | MA solid        | > 100 | > 100 | > 100 | > 100 |
|        |                                   |                           | MB liquid       | > 100 | > 100 | > 100 | > 100 |
| PG42-B | <i>Dietzia alimentaria</i>        | Gill                      | MA solid        | > 100 | > 100 | > 100 | > 100 |
|        |                                   |                           | MB liquid       | > 100 | > 100 | > 100 | > 100 |
| PG39-B | <i>Brevundimonas mediterranea</i> | Gill                      | MA solid        | > 100 | > 100 | > 100 | > 100 |
|        |                                   |                           | MB liquid       | > 100 | > 100 | > 100 | > 100 |
| PS3-B  | <i>Psychrobacter</i> sp.          | Gut (Stomach) Epithelium) | MA solid        | > 100 | > 100 | 23.3  | 28.9  |
|        |                                   |                           | MB liquid       | > 100 | > 100 | 11.4  | 7.5   |
| PSD1-B | <i>Bacillus</i> sp.               | Gut (Stomach) Digesta     | MA solid        | > 100 | > 100 | > 100 | > 100 |
|        |                                   |                           | MB liquid       | > 100 | > 100 | > 100 | > 100 |
| PSD4-B | <i>Shewanella colwelliana</i>     |                           | MA solid        | > 100 | 25.4  | 29.1  | 30.8  |

|            |                                         |                               |            |       |       |       |       |
|------------|-----------------------------------------|-------------------------------|------------|-------|-------|-------|-------|
|            |                                         | Gut (Stomach)<br>Digesta      | MB liquid  | n.g.  | n.g.  | n.g.  | n.g.  |
| PI1-B      | <i>Bacillus</i> sp.                     | Gut (Intestine)<br>Epithelium | MA solid   | > 100 | 14.7  | 18.5  | 15.0  |
|            |                                         |                               | MB liquid  | > 100 | 54.2  | 22.1  | 11.6  |
| PI2-B      | <i>Vibrio</i> sp.                       | Gut (Intestine)<br>Epithelium | MA solid   | > 100 | 14.1  | 15.8  | 17.5  |
|            |                                         |                               | MB liquid  | > 100 | > 100 | 36.4  | 9.0   |
| PI8-B      | <i>Pseudoalteromonas</i> sp.            | Gut (Intestine)<br>Epithelium | MA solid   | > 100 | 28.3  | 21.2  | 50.4  |
|            |                                         |                               | MB liquid  | > 100 | 36.6  | 8.1   | 8.2   |
| PID2-B     | <i>Shewanella aestuarii</i>             | Gut<br>(Intestine)Digesta     | MA solid   | n.g.  | n.g.  | n.g.  | n.g.  |
|            |                                         |                               | MB liquid  | > 100 | > 100 | 6.8   | 4.9   |
| PID21-B    | <i>Bacillus</i> sp.                     | Gut (Intestine)<br>Digesta    | MA solid   | 4.7   | > 100 | 10.2  | > 100 |
|            |                                         |                               | MB liquid  | 28.4  | > 100 | 5.9   | > 100 |
| MCC-PID1-B | <i>Photobacterium</i> sp.               | Gut (Intestine)<br>Digesta    | MA solid   | > 100 | 40.2  | 35.0  | 69.0  |
|            |                                         |                               | MB liquid  | n.g.  | n.g.  | n.g.  | n.g.  |
| PI9-F      | <i>Aureobasidium pullulans</i>          | Gut (Intestine)<br>Epithelium | PDA solid  | > 100 | 22.6  | 40.8  | 30.7  |
|            |                                         |                               | PDA liquid | > 100 | > 100 | 8.9   | 3.3   |
| PG36-F     | <i>Leotiomycetes incertae<br/>sedis</i> | Gill                          | PDA solid  | >100  | >100  | > 100 | > 100 |
|            |                                         |                               | PDA liquid | >100  | >100  | > 100 | > 100 |
|            | Positive control                        | -                             | -          | 0.4   | 0.5   | 1.5   | 0.2   |

**Table S4.** Putative annotation of metabolites detected in *Bacillus* sp. PID21-B.  $t_R$ : Retention time

| ID    | Exp. m/z | $t_R$<br>(min) | $\Delta$<br>ppm | Putative<br>molecular<br>formula                              | Ionization          | MS/MS<br>fragmentation<br>pattern                                          | Putatively<br>annotated<br>compound(s)            | Chemical<br>family   | Biological<br>Source          | Reported<br>bioactivity     | Structures                                                                            | Reference(s) |
|-------|----------|----------------|-----------------|---------------------------------------------------------------|---------------------|----------------------------------------------------------------------------|---------------------------------------------------|----------------------|-------------------------------|-----------------------------|---------------------------------------------------------------------------------------|--------------|
| P21-1 | 328.2858 | 10.9192        | 1.5             | C <sub>19</sub> H <sub>37</sub> NO <sub>3</sub>               | [M+H] <sup>+</sup>  | 217.8850,<br>95.0867,<br>245.8821,<br>123.1166,<br>76.0407                 | Alanine; <i>N</i> -<br>pentadecanoyl, Me<br>ester | N-acetyl<br>amines   | many<br>microorganisms        |                             | 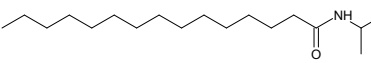   | [1]          |
| P21-2 | 412.1368 | 6.323          | 0.2             | C <sub>20</sub> H <sub>23</sub> NO <sub>7</sub>               | [M+Na] <sup>+</sup> | 272.1258,<br>394.1268                                                      | AI-77-F                                           | Isocoumarin          | <i>Bacillus pumilus</i>       | antibacterial,<br>antiulcer |    | [1]          |
| P21-3 | 323.195  | 6.5926         | 1.5             | C <sub>15</sub> H <sub>28</sub> N <sub>2</sub> O <sub>4</sub> | [M+Na] <sup>+</sup> |                                                                            | Lipoamide A                                       | N-acyl<br>amine      | <i>Bacillus pumilus</i>       | antibacterial               |    | [2]          |
| P21-4 | 955.5202 | 7.9466         | NA              |                                                               |                     | 489.2563,<br>276.1196,<br>258.1086,<br>491.2620,<br>375.1877               |                                                   |                      |                               |                             | Unidentified                                                                          |              |
| P21-5 | 337.2107 | 7.1797         | 1.2             | C <sub>16</sub> H <sub>30</sub> N <sub>2</sub> O <sub>4</sub> | [M+Na] <sup>+</sup> | 133.06, 200.20,<br>298.20, 109.1                                           | Lipoamide B                                       | N-acyl<br>amine      | <i>Bacillus pumilus</i>       | not reported                |    | [2]          |
| P21-6 | 439.208  | 4.7314         | NA              |                                                               |                     | 232.1344,<br>250.1449,<br>215.1078,<br>176.0713,<br>149.0901,<br>422.1825, |                                                   |                      |                               |                             | Unidentified                                                                          |              |
| P21-7 | 312.2177 | 7.7286         | 1.9             | C <sub>17</sub> H <sub>29</sub> NO <sub>4</sub>               | [M+H] <sup>+</sup>  | 214.2179,<br>88.0409                                                       | Antibiotic Y 03559J-A                             | Fatty acid           | <i>Micromonospora</i><br>sp.  | Gram positiv                |  | [3]          |
| P21-8 | 467.2731 | 7.9527         | -0.5            | C <sub>24</sub> H <sub>38</sub> N <sub>2</sub> O <sub>7</sub> | [M+H] <sup>+</sup>  | 326.8519,<br>257.0879                                                      | Farneside A                                       | Terpenoid<br>(mixed) | Marine<br><i>Streptomyces</i> | Antimalarial                |  | [4]          |

|        |          |         |      |                                                               |                     |                                                                                                     |                           |               |                         |                             |                                                                                       |     |
|--------|----------|---------|------|---------------------------------------------------------------|---------------------|-----------------------------------------------------------------------------------------------------|---------------------------|---------------|-------------------------|-----------------------------|---------------------------------------------------------------------------------------|-----|
| P21-9  | 911.5562 | 7.9466  | NA   |                                                               |                     | 467.2738,<br>354.1901,<br>254.1378,<br>155.0683                                                     |                           |               |                         |                             | Unidentified                                                                          |     |
| P21-10 | 445.2912 | 7.9527  | NA   |                                                               |                     | 186.1484,<br>72.0834,<br>214.1451,<br>314.1936,                                                     |                           |               |                         |                             | Unidentified                                                                          |     |
| P21-11 | 889.5519 | 11.3895 | NA   |                                                               |                     |                                                                                                     |                           |               |                         |                             | Unidentified                                                                          |     |
| P21-12 | 326.2699 | 10.3931 | 1.5  | C <sub>19</sub> H <sub>35</sub> NO <sub>3</sub>               | [M+H] <sup>+</sup>  | 308.2589                                                                                            | Fluvirucin C <sub>2</sub> | Macrolide     | Marine Actinomycete     |                             | 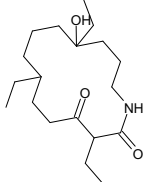   | [5] |
| P21-13 | 663.3562 | 7.8588  | NA   |                                                               |                     | 365.1068,<br>501.3032                                                                               |                           |               |                         |                             | Unidentified                                                                          |     |
| P21-14 | 390.155  | 6.323   | 0.1  | C <sub>20</sub> H <sub>23</sub> NO <sub>7</sub>               | [M+H] <sup>+</sup>  | 215.1065,<br>232.1329,<br>159.0439,<br>250.1431,<br>123.0082,<br>149.0592,<br>176.0707,<br>197.0955 | AI-77-F                   | Isocoumarin   | <i>Bacillus pumilus</i> |                             |    | [1] |
| P21-15 | 301.2132 | 6.5926  | 2.5  | C <sub>15</sub> H <sub>28</sub> N <sub>2</sub> O <sub>4</sub> | [M+H] <sup>+</sup>  | 133.0613,<br>186.1860,<br>284.1867,<br>151.14, 95.0860,<br>116.0345                                 | Lipoamide A               | N-acyl amine  | <i>Bacillus pumilus</i> |                             |    | [2] |
| P21-16 | 351.2258 | 7.7286  | 0.6  | C <sub>17</sub> H <sub>32</sub> N <sub>2</sub> O <sub>4</sub> | [M+Na] <sup>+</sup> | 155.0427,<br>254.8679,                                                                              | Lipoamide C               | N-acyl amine  | <i>Bacillus pumilus</i> |                             |    | [2] |
| P21-17 | 407.1816 | 4.5482  | -0.3 | C <sub>20</sub> H <sub>26</sub> N <sub>2</sub> O <sub>7</sub> | [M+H] <sup>+</sup>  | 215.1066,<br>232.1334,<br>159.0539,<br>250.1443,<br>274.0711,<br>390.1536,<br>175.0388              | Amicoumacin C             | Isocoumarin   | <i>Bacillus pumilus</i> | antibacterial,<br>antiulcer |  | [6] |
| P21-18 | 315.2288 | 7.1797  | 0    | C <sub>16</sub> H <sub>30</sub> N <sub>2</sub> O <sub>4</sub> | [M+H] <sup>+</sup>  | 133.0616,<br>200.2015,<br>298.2014,<br>109.1020,<br>85.0550,<br>165.1649                            | Lipoamide B               | N-acyl amines | <i>Bacillus pumilus</i> |                             |  | [2] |

|        |          |         |      |                                                               |                     |                                                                                                                  |                                     |                 |                         |                                                                  |                                                                                     |     |
|--------|----------|---------|------|---------------------------------------------------------------|---------------------|------------------------------------------------------------------------------------------------------------------|-------------------------------------|-----------------|-------------------------|------------------------------------------------------------------|-------------------------------------------------------------------------------------|-----|
| P21-19 | 479.3458 | 10.3625 | -0.2 | C <sub>25</sub> H <sub>48</sub> N <sub>2</sub> O <sub>5</sub> | [M+Na] <sup>+</sup> | 355.261                                                                                                          | Fluvirucin B                        | Polyketides     | <i>Actinomyces</i> sp.  | not reported                                                     | 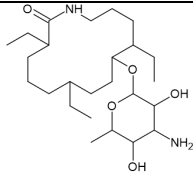 | [5] |
| P21-20 | 300.2546 | 9.8264  | NA   |                                                               |                     | 95.0864,<br>109.1016,<br>123.1177,<br>76.0404,<br>137.1322,<br>81.0698                                           |                                     |                 |                         |                                                                  | Unidentified                                                                        |     |
| P21-21 | 314.2702 | 10.4201 | 2.2  | C <sub>18</sub> H <sub>35</sub> NO <sub>3</sub>               | [M+H] <sup>+</sup>  | 95.0860,<br>109.1026,<br>215.8649,<br>123.1157                                                                   | Alanine-N-Tetradecanoylmethyl ester | N-acetyl amines | many microorganisms     |                                                                  |                                                                                     | [7] |
| P21-22 | 424.2078 | 4.2692  | 0.5  | C <sub>20</sub> H <sub>29</sub> N <sub>3</sub> O <sub>7</sub> | [M+H] <sup>+</sup>  | 232.1339,<br>250.1447,<br>215.1075,<br>274.0721,<br>407.1824,<br>390.1551,<br>159.0445,<br>175.0395,<br>330.1344 | Amicoumacin A                       |                 | <i>Bacillus pumilus</i> | Antimicrobial, antiulcer, antiinflammatory, anticholesterol-emic |  | [6] |

**Table S5.** Putative annotation of metabolites detected in *Bacillus* sp. PI1-B.  $t_R$ : Retention time

| ID    | Exp. m/z | $t_R$<br>(min) | $\Delta$<br>ppm | Putative<br>molecular<br>formula                               | Ionization          | MS/MS<br>fragmentation<br>pattern                                                     | Putatively<br>annotated<br>compound(s) | Chemical<br>family | Biological<br>Source      | Reported<br>bioactivity           | Structures                                                                          | Reference(s) |
|-------|----------|----------------|-----------------|----------------------------------------------------------------|---------------------|---------------------------------------------------------------------------------------|----------------------------------------|--------------------|---------------------------|-----------------------------------|-------------------------------------------------------------------------------------|--------------|
| PI1-1 | 417.1489 | 6.0213         | 0.2             | C <sub>15</sub> H <sub>26</sub> N <sub>2</sub> O <sub>10</sub> | [M+Na] <sup>+</sup> | 266.1366,<br>139.0844, 217.04<br>48, 337.1729,<br>329.0967,<br>307.1156               | Enkastine; Enkastine<br>2              | Glycopeptid<br>e   | <i>Streptomyces albus</i> | inhibitor of the<br>endopeptidase | 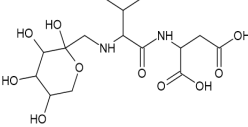 | [8]          |
| PI1-2 | 352.2458 | 5.1465         | NA              |                                                                |                     | 254.8668                                                                              |                                        |                    |                           |                                   | Unidentified                                                                        |              |
| PI1-3 | 331.169  | 4.3803         | NA              |                                                                |                     | 261.1249,<br>159.0585,<br>142.0859,<br>184.0963,<br>243.1148,<br>297.0343,<br>99.0562 |                                        |                    |                           |                                   | Unidentified                                                                        |              |
| PI1-4 | 268.2636 | 10.787         | 1.2             | C <sub>17</sub> H <sub>33</sub> NO                             | [M+H] <sup>+</sup>  | 135.1166,<br>149.1318,<br>233.2263,<br>121.1011                                       |                                        |                    |                           |                                   | Unidentified                                                                        |              |
| PI1-5 | 465.1491 | 6.6292         | NA              |                                                                |                     | 329.0951,<br>139.0841,<br>314.1358,<br>307.1119,<br>273.0329,<br>157.0422             |                                        |                    |                           |                                   | Unidentified                                                                        |              |

**Table S6.** Putative annotation of metabolites detected in *Microbacterium* sp. PG11-B

| ID     | Exp. m/z | $t_R$<br>(min) | $\Delta$<br>ppm | Putative<br>molecular<br>formula | Ionization | MS/MS<br>fragmentation<br>pattern  | Putatively<br>annotated<br>compound(s) | Chemical<br>family | Biological<br>Source | Reported<br>bioactivity | Structures   | Reference(s) |
|--------|----------|----------------|-----------------|----------------------------------|------------|------------------------------------|----------------------------------------|--------------------|----------------------|-------------------------|--------------|--------------|
| PG11-1 | 716.5224 | 11.339         | NA              |                                  |            | 549.4882,<br>280.2655,<br>237.2218 |                                        |                    |                      |                         | Unidentified |              |

**Table S7.** Putative annotation of metabolites detected in *Chryseobacterium carnis* PG10-B

| ID      | Exp. m/z | t <sub>R</sub><br>(min) | Δ<br>ppm | Putative<br>molecular<br>formula                                  | Ionization          | MS/MS<br>fragmentation<br>pattern                   | Putatively<br>annotated<br>compound(s)       | Chemical<br>family       | Biological<br>Source               | Reported<br>bioactivity | Structures                                                                          | Reference(s) |
|---------|----------|-------------------------|----------|-------------------------------------------------------------------|---------------------|-----------------------------------------------------|----------------------------------------------|--------------------------|------------------------------------|-------------------------|-------------------------------------------------------------------------------------|--------------|
| PG10-1  | 641.7462 | 10.9422                 | NA       |                                                                   |                     | 115.08, 366.30,<br>347.30, 70.06,<br>319.30         |                                              |                          |                                    |                         | Unidentified                                                                        |              |
| PG10-2  | 627.7277 | 10.7071                 | NA       |                                                                   |                     | 115.08, 352.28,<br>333.28, 305.29,<br>70.06         |                                              |                          |                                    |                         | Unidentified                                                                        |              |
| PG10-3  | 627.5311 | 10.7096                 | NA       |                                                                   |                     | 115.08, 352.28,<br>333.28, 305.29,<br>70.07         |                                              |                          |                                    |                         | Unidentified                                                                        |              |
| PG10-4  | 325.2734 | 8.3097                  | -4.6     | C <sub>18</sub> H <sub>38</sub> O <sub>3</sub>                    | [M+Na] <sup>+</sup> | 215.8904,<br>189.8653,<br>95.0873,<br>243.8862      | 3-hydroxy-16-<br>methylheptadecanoic<br>acid | Fatty acid               | <i>Bacillus</i> sp.                |                         |                                                                                     | [9]          |
| PG10-5  | 490.1445 | 5.1638                  | 4.3      | C <sub>17</sub> H <sub>23</sub> N <sub>5</sub><br>O <sub>12</sub> | [M+H] <sup>+</sup>  | 301.11, 360.08,<br>416.07, 171.05,<br>472.13        | Polyoxin O                                   | nucleoside<br>antibiotic | <i>Streptomyces<br/>piomogenus</i> | antifungal              | 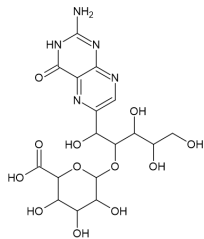 | [10]         |
| PG10-6  | 419.3118 | 6.2497                  | NA       |                                                                   |                     | 96.04, 353.27,<br>113.07, 126.05,<br>240.23, 335.26 |                                              |                          |                                    |                         | Unidentified                                                                        |              |
| PG10-7  | 433.3271 | 6.7091                  | NA       |                                                                   |                     | 96.04, 367.29,<br>126.05, 144.06,<br>254.24, 113.07 |                                              |                          |                                    |                         | Unidentified                                                                        |              |
| PG10-8  | 433.3278 | 6.6721                  | NA       |                                                                   |                     |                                                     |                                              |                          |                                    |                         | Unidentified                                                                        |              |
| PG10-9  | 405.2955 | 5.8762                  | NA       |                                                                   |                     | 96.04, 339.26,<br>226.21, 126.05,<br>322.24         |                                              |                          |                                    |                         | Unidentified                                                                        |              |
| PG10-10 | 613.5155 | 10.4721                 | NA       |                                                                   |                     | 115.08, 338.26,<br>352.28, 319.27,                  |                                              |                          |                                    |                         | Unidentified                                                                        |              |
| PG10-11 | 312.1107 | 5.4846                  | NA       |                                                                   |                     | 156.88, 254.92,<br>230.88, 210.93                   |                                              |                          |                                    |                         | Unidentified                                                                        |              |

|         |          |         |    |  |  |                                                              |  |  |  |  |              |  |
|---------|----------|---------|----|--|--|--------------------------------------------------------------|--|--|--|--|--------------|--|
| PG10-12 | 649.5128 | 10.7105 | NA |  |  | 137.0691,<br>391.2927,<br>373.2812,<br>535.4332,<br>649.5107 |  |  |  |  | Unidentified |  |
| PG10-13 | 663.5285 | 10.9442 | NA |  |  | 137.0687,<br>405.3062,<br>387.2975,<br>549.4487,<br>646.5020 |  |  |  |  | Unidentified |  |
| PG10-14 | 639.5308 | 10.5996 | NA |  |  |                                                              |  |  |  |  | Unidentified |  |

**Table S8.** Putative annotation of metabolites detected in *Shewanella baltica* PG1-B

| ID    | Exp. m/z | t <sub>R</sub><br>(min) | Δ<br>ppm                 | Putative<br>molecular<br>formula               | Ionization | MS/MS<br>fragmentation<br>pattern                                         | Putatively<br>annotated<br>compound(s)                       | Chemical<br>family | Biological<br>Source | Reported<br>bioactivity | Structures                                                                            | Reference(s)                                                                                                                      |
|-------|----------|-------------------------|--------------------------|------------------------------------------------|------------|---------------------------------------------------------------------------|--------------------------------------------------------------|--------------------|----------------------|-------------------------|---------------------------------------------------------------------------------------|-----------------------------------------------------------------------------------------------------------------------------------|
| PG1-1 | 377.2681 | 10.0943                 | NA                       |                                                |            | 285.22, 145.10,<br>267.21, 173.13,<br>187.14, 201.16,<br>131.08, 159.11   |                                                              |                    |                      |                         | Unidentified                                                                          |                                                                                                                                   |
| PG1-2 | 781.5613 | 8.375                   | [2M+<br>H] <sup>+</sup>  | C <sub>24</sub> H <sub>38</sub> O <sub>4</sub> |            | 355.2639,<br>337.2531,<br>319.2430,<br>213.1642,<br>159.1178,<br>133.1078 | (3α,5β)-3-Hydroxy-<br>6-oxocholan-24-oic<br>acid             | Terpenoid          |                      |                         | 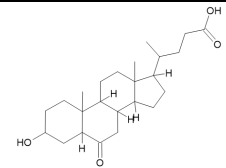   | <a href="https://www.chemspider.com/Chemical-Structure.144621.html">https://www.chemspider.com/Chemical-Structure.144621.html</a> |
| PG1-3 | 753.5283 | 10.3714                 | NA                       |                                                |            | 735.5281,<br>735.5144,<br>559.4728,<br>407.3122                           |                                                              |                    |                      |                         | Unidentified                                                                          |                                                                                                                                   |
| PG1-4 | 303.2319 | 10.666                  | NA                       |                                                |            | 119.0858,<br>161.1331,<br>133.1014,<br>105.0713                           |                                                              |                    |                      |                         | Unidentified                                                                          |                                                                                                                                   |
| PG1-5 | 835.5328 | 6.8779                  | [2M+<br>Na] <sup>+</sup> | C <sub>24</sub> H <sub>38</sub> O <sub>5</sub> |            | 429.2616                                                                  | (3β,5β,7β)-3,7-<br>Dihydroxy-12-<br>oxocholan-24-oic<br>acid | Terpenoid          |                      |                         |  |                                                                                                                                   |
| PG1-6 | 614.4932 | 9.3475                  | NA                       |                                                |            | 150.0546                                                                  |                                                              |                    |                      |                         | Unidentified                                                                          |                                                                                                                                   |
| PG1-7 | 485.2232 | 8.375                   | NA                       |                                                |            | 315.2597,<br>215.1812                                                     |                                                              |                    |                      |                         | Unidentified                                                                          |                                                                                                                                   |
| PG1-8 | 771.5393 | 8.8353                  | NA                       |                                                |            | 753.5294,<br>577.4780                                                     |                                                              |                    |                      |                         | Unidentified                                                                          |                                                                                                                                   |



|        |          |         |    |  |  |                                                                                                     |  |  |  |  |              |  |
|--------|----------|---------|----|--|--|-----------------------------------------------------------------------------------------------------|--|--|--|--|--------------|--|
| PG1-9  | 337.2535 | 8.375   | NA |  |  | 319.2427,<br>213.1646,<br>267.2116,<br>159.1172,<br>279.2107                                        |  |  |  |  | Unidentified |  |
| PG1-10 | 775.5491 | 10.9359 | NA |  |  | 757.5405                                                                                            |  |  |  |  | Unidentified |  |
| PG1-11 | 609.5212 | 10.8623 | NA |  |  | 115.0873,<br>350.2710,<br>367.2965,<br>303.2797                                                     |  |  |  |  | Unidentified |  |
| PG1-12 | 614.4937 | 7.979   | NA |  |  | 150.0551                                                                                            |  |  |  |  | Unidentified |  |
| PG1-13 | 813.5508 | 6.8779  | NA |  |  | 371.2585,<br>355.2639,<br>353.2474,<br>335.2375,<br>319.2418,<br>245.1538,<br>199.1478,<br>159.1173 |  |  |  |  | Unidentified |  |

**Table S9.** Putative annotation of metabolites detected in *Shewanella aestuarii* PID2-B

| ID      | Exp. m/z | t <sub>R</sub> (min) | Δ ppm | Putative molecular formula                      | Ionization                          | MS/MS fragmentation pattern                     | Putatively annotated compound(s)                          | Chemical family | Biological Source                | Reported bioactivity | Structures                                                                            | Reference(s) |
|---------|----------|----------------------|-------|-------------------------------------------------|-------------------------------------|-------------------------------------------------|-----------------------------------------------------------|-----------------|----------------------------------|----------------------|---------------------------------------------------------------------------------------|--------------|
| PID2-1  | 263.2381 | 11.3215              |       | C <sub>18</sub> H <sub>32</sub> O <sub>2</sub>  | [M+H-H <sub>2</sub> O] <sup>+</sup> | 245.2276, 95.0856, 109.1010, 133.1012, 147.1177 | 10E,Z12-CLA                                               | fatty acid      |                                  |                      | 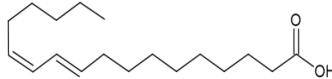   |              |
| PID2-2  | 499.3762 | 11.0524              | NA    |                                                 | [M+Na] <sup>+</sup>                 | 332.7257, 481.3620                              |                                                           |                 |                                  |                      | Unidentified                                                                          |              |
|         |          |                      |       |                                                 | [M+H] <sup>+</sup>                  |                                                 |                                                           |                 |                                  |                      | Unidentified                                                                          |              |
| PID2-3  | 642.4704 | 11.0127              | NA    |                                                 |                                     | 483.3797, 182.0799                              |                                                           |                 |                                  |                      | Unidentified                                                                          |              |
| PID2-4  | 501.3918 | 10.5022              | NA    |                                                 |                                     | 483.3795, 194.1304                              |                                                           |                 |                                  |                      | Unidentified                                                                          |              |
| PID2-5  | 517.3865 | 8.6097               | NA    |                                                 |                                     | 499.3706                                        |                                                           |                 |                                  |                      | Unidentified                                                                          |              |
| PID2-6  | 517.3868 | 6.8578               | NA    |                                                 |                                     | 499.3751, 277.1782                              |                                                           |                 |                                  |                      | Unidentified                                                                          |              |
| PID2-7  | 643.4185 | 8.8808               | 0.6   | C <sub>36</sub> H <sub>60</sub> O <sub>8</sub>  | [M+Na] <sup>+</sup>                 | 203.0506                                        | 21-deoxy-bafilomycin A2                                   |                 | <i>Streptomyces</i> sp.          | Antibiotic           |    | [11]         |
| PID2-8  | 600.4603 | 8.1608               | NA    |                                                 |                                     | 483.38                                          |                                                           |                 |                                  |                      | Unidentified                                                                          |              |
| PID2-9  | 563.3495 | 10.9754              |       |                                                 |                                     | 433.2869, 367.8052, 184.8905                    |                                                           |                 |                                  |                      | Unidentified                                                                          |              |
| PID2-10 | 281.2124 | 9.1462               | NA    |                                                 | [M+H] <sup>+</sup>                  | 168.079                                         |                                                           |                 |                                  |                      | Unidentified                                                                          |              |
| PID2-11 | 239.1655 | 8.5331               | 0.4   | C <sub>14</sub> H <sub>22</sub> O <sub>3</sub>  | [M+H] <sup>+</sup>                  | 211.1695, 126.0319                              | Violapyrone C                                             | α-pyrone        | <i>Streptomyces violascens</i>   |                      |   | [12]         |
| PID2-12 | 578.4783 | 8.1608               | 0.3   | C <sub>36</sub> H <sub>63</sub> NO <sub>5</sub> | [M+H] <sup>+</sup>                  | 118.0867, 72.0816, 135.1178                     | 35-Amino-3-methyl-11-bacteriohopene-30,31,32,33,34-pentol | Terpenoids      | <i>Methylocaldum szegediense</i> |                      |  | [13]         |
| PID2-13 | 515.3712 | 7.4033               | NA    |                                                 | [M+H] <sup>+</sup>                  | 497.3605, 275.1620                              |                                                           |                 |                                  |                      | Unidentified                                                                          |              |

**Table S10.** Putative annotation of metabolites detected in *Shewanella colwelliana* PSD4-B

| ID     | Exp. m/z   | t <sub>R</sub><br>(min) | Δ<br>ppm | Putative<br>molecular<br>formula | Ionization         | MS/MS<br>fragmentation<br>pattern                                                                   | Putatively<br>annotated<br>compound(s)                       | Chemical<br>family | Biological<br>Source | Reported<br>bioactivity | Structures   | Reference(s) |
|--------|------------|-------------------------|----------|----------------------------------|--------------------|-----------------------------------------------------------------------------------------------------|--------------------------------------------------------------|--------------------|----------------------|-------------------------|--------------|--------------|
| PSD4-1 | 554.330261 | 8.5863                  | NA       |                                  |                    | 226.0707,<br>351.2501,<br>434.2899                                                                  |                                                              |                    |                      |                         | Unidentified |              |
| PSD4-2 | 329.270187 | 10.27301<br>67          | NA       |                                  |                    | 219.2118,<br>135.1173,<br>121.1019,<br>311.2581,<br>107.0856,<br>95.0866                            |                                                              |                    |                      |                         | Unidentified |              |
| PSD4-3 | 513.304001 | 8.728766<br>67          | NA       |                                  |                    | 513.3036                                                                                            |                                                              |                    |                      |                         | Unidentified |              |
| PSD4-4 | 303.2327   | 10.7001                 | 1.3      |                                  | [M+H] <sup>+</sup> | 133.1015,<br>161.1332,<br>221.1540,<br>175.1487,<br>257.1912,<br>119.0855,<br>207.1383,<br>233.1543 | C <sub>20</sub> H <sub>30</sub> O <sub>2</sub> (270<br>hits) |                    |                      |                         | Unidentified |              |

**Table S11.** Putative annotation of metabolites detected in *Psychrobacter* sp. PS3-B

| ID    | Exp. m/z | t <sub>R</sub><br>(min) | Δ<br>ppm | Putative<br>molecular<br>formula                | Ionization                                                               | MS/MS<br>fragmentation<br>pattern | Putatively<br>annotated<br>compound(s)                                                                                    | Chemical<br>family | Biological<br>Source                | Reported<br>bioactivity | Structures                                                                            | Reference(s)                                                                                                                  |
|-------|----------|-------------------------|----------|-------------------------------------------------|--------------------------------------------------------------------------|-----------------------------------|---------------------------------------------------------------------------------------------------------------------------|--------------------|-------------------------------------|-------------------------|---------------------------------------------------------------------------------------|-------------------------------------------------------------------------------------------------------------------------------|
| PS3-1 | 448.306  | 6.039                   |          | C <sub>26</sub> H <sub>43</sub> NO <sub>6</sub> | [M-H <sub>2</sub> O+H] <sup>+</sup>                                      |                                   | Glycocholic acid<br><br>3,7,12-trihydroxy-10,13-dimethylhexadecahydro-1H-cyclopenta[a]phenanthren-17-yl)pentanoyl)glycine | Bile acid          |                                     |                         | 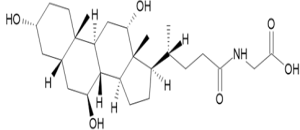   | <a href="https://www.chemspider.com/Chemical-Structure.9734.html">https://www.chemspider.com/Chemical-Structure.9734.html</a> |
| PS3-2 | 430.2956 | 6.039                   |          | C <sub>26</sub> H <sub>43</sub> NO <sub>6</sub> | [M-2H <sub>2</sub> O+H] <sup>+</sup>                                     |                                   | Glycocholic acid<br><br>3,7,12-trihydroxy-10,13-dimethylhexadecahydro-1H-cyclopenta[a]phenanthren-17-yl)pentanoyl)glycine | Bile acid          |                                     |                         |    | <a href="https://www.chemspider.com/Chemical-Structure.9734.html">https://www.chemspider.com/Chemical-Structure.9734.html</a> |
| PS3-3 | 466.3165 | 6.039                   |          | C <sub>26</sub> H <sub>43</sub> NO <sub>6</sub> | [M+H] <sup>+</sup>                                                       |                                   | Glycocholic acid<br><br>3,7,12-trihydroxy-10,13-dimethylhexadecahydro-1H-cyclopenta[a]phenanthren-17-yl)pentanoyl)glycine | Bile acid          |                                     |                         |    | <a href="https://www.chemspider.com/Chemical-Structure.9734.html">https://www.chemspider.com/Chemical-Structure.9734.html</a> |
| PS3-4 | 312.2906 | 10.3647                 | NA       |                                                 | 294.2798,<br>135.1184,<br>215.8662,<br>149.1329,<br>177.1669,<br>95.0867 |                                   | No hit                                                                                                                    |                    |                                     |                         | Unidentified                                                                          |                                                                                                                               |
| PS3-5 | 272.2595 | 9.313                   | 2.2      | C <sub>16</sub> H <sub>34</sub> NO <sub>2</sub> | 255.2331,<br>230.2488,<br>95.0865                                        |                                   | C16-Sphingosine<br><br>2-Amino-4-hexadecane-1,3-diol                                                                      | Aminolipid         | constitute of various sphingolipids |                         |  | [14]                                                                                                                          |

**Table S12.** Putative annotation of metabolites detected in *Vibrio aestuarianus* PG12-B

| ID      | Exp. m/z | t <sub>R</sub><br>(min) | Δ<br>ppm | Putative<br>molecular<br>formula                | Ionization         | MS/MS<br>fragmentation<br>pattern                                                    | Putatively<br>annotated<br>compound(s)                                | Chemical<br>family | Biological<br>Source                           | Reported<br>bioactivity | Structures                                                                          | Reference(s) |
|---------|----------|-------------------------|----------|-------------------------------------------------|--------------------|--------------------------------------------------------------------------------------|-----------------------------------------------------------------------|--------------------|------------------------------------------------|-------------------------|-------------------------------------------------------------------------------------|--------------|
| PG12-1  | 144.045  | 6.1096                  | NA       |                                                 |                    | 103.9569,<br>116.0502                                                                |                                                                       |                    |                                                |                         | Unidentified                                                                        |              |
| PG12-2  | 419.2878 | 9.5502                  | NA       |                                                 |                    |                                                                                      |                                                                       |                    |                                                |                         | Unidentified                                                                        |              |
| PG12-3  | 405.272  | 8.8097                  | NA       |                                                 |                    | 151.0477,<br>388.2445,<br>170.0609                                                   |                                                                       |                    |                                                |                         | Unidentified                                                                        |              |
| PG12-4  | 366.2639 | 8.8948                  | NA       |                                                 |                    | 84.0462,<br>102.0553,<br>256.2645,<br>235.8719                                       |                                                                       |                    |                                                |                         | Unidentified                                                                        |              |
| PG12-5  | 368.2791 | 9.6612                  | -2.7     | C <sub>21</sub> H <sub>37</sub> NO <sub>4</sub> | [M+H] <sup>+</sup> | 84.0463,<br>102.0559                                                                 | Tumonoic acid A;<br>Et ester                                          | polyketide         | <i>L. majuscula</i><br>and <i>S. calcicola</i> | anti-inflammatory       | 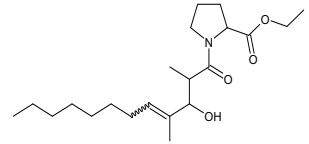 | [15]         |
| PG12-6  | 339.2639 | 9.5781                  | NA       |                                                 |                    |                                                                                      |                                                                       |                    |                                                |                         | Unidentified                                                                        |              |
| PG12-7  | 383.2792 | 10.3954                 | -1.8     | C <sub>22</sub> H <sub>38</sub> O <sub>5</sub>  | [M+H] <sup>+</sup> | 291.2315,<br>165.1270,<br>235.1685,<br>109.0657                                      | 4-Hydroxy-5-(hydroxymethyl)-3-(14-methyl-hexadecanoyl)-2(5H)-furanone | Polyketide         | <i>Streptomyces</i> sp                         | protease inhibitors     |  | [16]         |
| PG12-8  | 520.3036 | 10.4158                 | NA       |                                                 |                    |                                                                                      |                                                                       |                    |                                                |                         | Unidentified                                                                        |              |
| PG12-9  | 367.2956 | 10.7281                 | NA       |                                                 |                    | 129.0660,<br>84.0466,<br>256.2635,<br>95.0837                                        |                                                                       |                    |                                                |                         | Unidentified                                                                        |              |
| PG12-10 | 364.2615 | 7.9426                  | NA       |                                                 |                    | 98.9884,<br>142.0260,<br>235.8777                                                    |                                                                       |                    |                                                |                         | Unidentified                                                                        |              |
| PG12-11 | 365.2799 | 9.9365                  | NA       |                                                 |                    | 129.0660,<br>84.0463,<br>121.1017,<br>135.1168,<br>95.0867,<br>149.1317,<br>219.2099 |                                                                       |                    |                                                |                         |                                                                                     |              |

**Table S13.** Putative annotation of metabolites detected in *Vibrio* sp. PI2-B

| ID    | Exp. m/z | t <sub>R</sub><br>(min) | Δ<br>ppm | Putative<br>molecular<br>formula                              | Ionization          | MS/MS<br>fragmentation<br>pattern                            | Putatively<br>annotated<br>compound(s) | Chemical<br>family | Biological<br>Source                       | Reported<br>bioactivity | Structures                                                                          | Reference(s) |
|-------|----------|-------------------------|----------|---------------------------------------------------------------|---------------------|--------------------------------------------------------------|----------------------------------------|--------------------|--------------------------------------------|-------------------------|-------------------------------------------------------------------------------------|--------------|
| 1     | 286.0937 | 3.2199                  | NA       |                                                               |                     | 258.0984,<br>241.0716,<br>216.0765,<br>269.0666,<br>134.0599 |                                        |                    |                                            |                         | Unidentified                                                                        |              |
| P2- 2 | 397.2693 | 9.2215                  | NA       |                                                               |                     | 144.0201,<br>161.0556,<br>88.0406,<br>115.0515               |                                        |                    |                                            |                         | Unidentified                                                                        |              |
| P2-3  | 579.3203 | 8.5626                  | NA       |                                                               |                     | 269.0685,<br>171.0920,<br>311.2577,<br>144.0807,<br>189.1022 |                                        |                    |                                            |                         | Unidentified                                                                        |              |
| P2-4  | 331.0917 | 4.1921                  | NA       |                                                               |                     | 201.8844,<br>157.8972,<br>252.8306                           |                                        |                    |                                            |                         | Unidentified                                                                        |              |
| P2-5  | 380.1368 | 5.5337                  | -2.4     | C <sub>22</sub> H <sub>19</sub> N <sub>3</sub> O <sub>2</sub> | [M+Na] <sup>+</sup> | 182.0490,<br>250.1128                                        | Marinacarboline C                      | alkaloid           | <i>Marinactinospora<br/>thermotolerans</i> | antiplasmodial          | 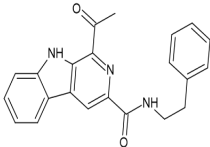 | [17]         |

**Table S14.** Putative annotation of metabolites detected in *Pseudoalteromonas* sp. PI8-B

| ID   | Exp. m/z | t <sub>R</sub><br>(min) | Δ<br>ppm | Putative<br>molecular<br>formula               | Ionization         | MS/MS<br>fragmentation<br>pattern                                        | Putatively<br>annotated<br>compound(s) | Chemical<br>family | Biological<br>Source   | Reported<br>bioactivity | Structures                                                                          | Reference(s) |
|------|----------|-------------------------|----------|------------------------------------------------|--------------------|--------------------------------------------------------------------------|----------------------------------------|--------------------|------------------------|-------------------------|-------------------------------------------------------------------------------------|--------------|
| P8-1 | 699.5643 | 11.4854                 | NA       |                                                |                    | 585.4852,<br>417.3098,<br>137.0691,<br>399.2975,<br>681.5519             |                                        |                    |                        |                         | Unidentified                                                                        |              |
|      | 673.549  | 11.4364                 | NA       |                                                |                    | 137.06,<br>656.52,<br>559.47,<br>115.08,<br>378.29,<br>391.29            |                                        |                    |                        |                         | Unidentified                                                                        |              |
| P8-3 | 327.2161 | 8.4704                  | -1.8     | C <sub>18</sub> H <sub>30</sub> O <sub>5</sub> | [M+H] <sup>+</sup> | 191.14,<br>235.16,<br>137.09,<br>207.17,<br>137.09                       | Albocycline B                          | Macrolide          | <i>Streptomyces</i> sp | antibacterial           | 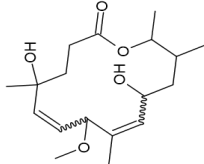 | [18]         |
| P8-4 | 677.5831 | 11.4854                 | NA       |                                                |                    | 115.08,<br>378.30,<br>395.32,<br>359.30,<br>331.31,<br>263.23,<br>159.07 |                                        |                    |                        |                         | Unidentified                                                                        |              |

**Table S15.** Putative annotation of metabolites detected in *Aureobasidium pullulans* PI9-F

| ID    | Exp. m/z | t <sub>R</sub><br>(min) | Δ<br>ppm | Putative<br>molecular<br>formula                | Ionization                          | MS/MS<br>fragmentation<br>pattern                            | Putatively<br>annotated<br>compound(s)                                                                | Chemical<br>family | Biological Source | Reported<br>bioactivity | Structures                                                                           | Reference(s)                                                                                                                                                                                                                                                                                                                      |
|-------|----------|-------------------------|----------|-------------------------------------------------|-------------------------------------|--------------------------------------------------------------|-------------------------------------------------------------------------------------------------------|--------------------|-------------------|-------------------------|--------------------------------------------------------------------------------------|-----------------------------------------------------------------------------------------------------------------------------------------------------------------------------------------------------------------------------------------------------------------------------------------------------------------------------------|
| PI9-1 | 577.3199 | 6.3572                  |          | C <sub>26</sub> H <sub>50</sub> O <sub>12</sub> | [M+Na] <sup>+</sup>                 | 373.1839,<br>227.1265,<br>275.0748,<br>109.1014,<br>559.3016 | 3-hydroxy-1-oxo-1-(2,3,4,5,6-pentahydroxyhexoxy) decan-5-yl] 3,5-dihydroxydecanoate                   | Lipid              |                   |                         | 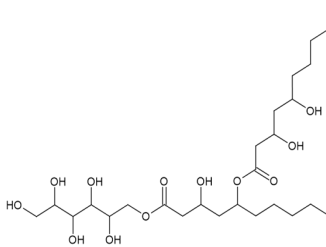  | PubChem [Internet]. Bethesda (MD): National Library of Medicine (US), National Center for Biotechnology Information ; 2004-. PubChem Compound Summary for CID 23843944; [cited 2022 July 19]. Available from: <a href="https://pubchem.ncbi.nlm.nih.gov/compound/23843944">https://pubchem.ncbi.nlm.nih.gov/compound/23843944</a> |
| PI9-2 | 745.5097 | 10.4858                 |          | C <sub>40</sub> H <sub>74</sub> O <sub>13</sub> | [M-H <sub>2</sub> O+H] <sup>+</sup> | 109.1019,<br>127.1126,<br>301.2123                           | 5-[5-[5-(3,5-dihydroxydecanoyloxy)-3-hydroxydecanoyl]oxy-3-hydroxydecanoyl]oxy-3-hydroxydecanoic acid | Lipid              |                   |                         |  |                                                                                                                                                                                                                                                                                                                                   |



|       |          |         |  |                                                 |                                      |                                                                           |                                                                                                                                         |       |                                |               |                                                                                     |      |
|-------|----------|---------|--|-------------------------------------------------|--------------------------------------|---------------------------------------------------------------------------|-----------------------------------------------------------------------------------------------------------------------------------------|-------|--------------------------------|---------------|-------------------------------------------------------------------------------------|------|
| PI9-3 | 745.5096 | 10.1982 |  | C <sub>40</sub> H <sub>74</sub> O <sub>13</sub> | [M-H <sub>2</sub> O+H] <sup>+</sup>  | 109.1017,<br>127.1125,<br>133.1017,<br>151.1118,<br>169.1230              | 5-[5-[5-(3,5-dihydroxydecanoylox)-3-hydroxydecanoyl]oxy-3-hydroxydecanoyl]oxy-3-hydroxydecanoic acid                                    | Lipid |                                |               |                                                                                     |      |
| PI9-4 | 705.4425 | 8.1025  |  | C <sub>36</sub> H <sub>68</sub> O <sub>15</sub> | [M-2H <sub>2</sub> O+H] <sup>+</sup> | 109.1017,<br>151.1113,<br>129.0556,<br>165.0772,<br>414.2536,<br>499.2908 | [3-hydroxy-1-[3-hydroxy-1-oxo-1-(2,3,4,5,6-pentahydroxyhexoxy)decan-5-yl]oxy-1-oxodecan-5-yl] 3,5-dihydroxydecanoate<br><br>Liamocin A1 | Lipid | <i>Aureobasidium pullulans</i> | antibacterial | 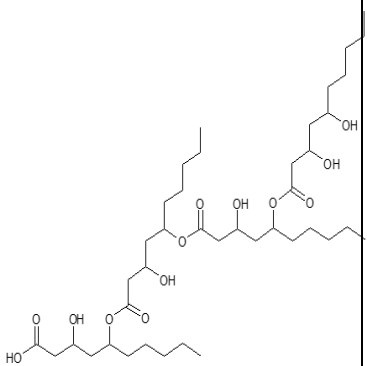 | [19] |
| PI9-5 | 763.4455 | 8.1025  |  | C <sub>36</sub> H <sub>68</sub> O <sub>15</sub> | [M+Na] <sup>+</sup>                  | 373.1857,<br>413.2517,<br>559.3098,<br>227.1268,<br>209.1161              | 3-hydroxy-1-[3-hydroxy-1-oxo-1-(2,3,4,5,6-pentahydroxyhexoxy)decan-5-yl]oxy-1-oxodecan-5-yl] 3,5-dihydroxydecanoate                     | Lipid | <i>Aureobasidium pullulans</i> | antibacterial |                                                                                     | [19] |
| PI9-6 | 723.4533 | 8.1025  |  | C <sub>36</sub> H <sub>68</sub> O <sub>15</sub> | [M-H <sub>2</sub> O+H] <sup>+</sup>  | 109.1018,<br>151.1125,<br>297.1706,<br>133.1017                           | 3-hydroxy-1-[3-hydroxy-1-oxo-1-(2,3,4,5,6-pentahydroxyhexoxy)decan-5-yl]oxy-1-oxodecan-5-yl] 3,5-dihydroxydecanoate                     | Lipid | <i>Aureobasidium pullulans</i> | antibacterial |                                                                                     | [19] |

|        |          |         |      |                                                 |                        |                                               |                                                                               |       |                                |               |                                                                                       |                                                                                                                                                                                                                                                                                                                                  |
|--------|----------|---------|------|-------------------------------------------------|------------------------|-----------------------------------------------|-------------------------------------------------------------------------------|-------|--------------------------------|---------------|---------------------------------------------------------------------------------------|----------------------------------------------------------------------------------------------------------------------------------------------------------------------------------------------------------------------------------------------------------------------------------------------------------------------------------|
| PI9-7  | 559.384  | 9.1386  |      | C <sub>30</sub> H <sub>56</sub> O <sub>10</sub> | [M-H <sub>2</sub> O+H] | 109                                           | 5-[5-(3,5-dihydroxy-decanoyloxy)-3-hydroxydecanoyl]oxy-3-hydroxydecanoic acid | Lipid |                                |               |                                                                                       | PubChem [Internet]. Bethesda (MD): National Library of Medicine (US), National Center for Biotechnology Information; 2004-. PubChem Compound Summary for CID 45359175; [cited 2022 July 19]. Available from: <a href="https://pubchem.ncbi.nlm.nih.gov/compound/45359175">https://pubchem.ncbi.nlm.nih.gov/compound/45359175</a> |
| PI9-7  | 388.2096 | 10.8918 | 1    | C <sub>20</sub> H <sub>31</sub> NO <sub>5</sub> | [M+Na] <sup>+</sup>    | 109.1015, 243.0533, 127.1120, 217.0169        | Brefeldin A; 7-O-( <i>N,N</i> -Dimethylaminoacetyl)                           |       | <i>Penicillium</i> sp          |               | 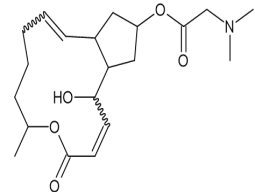   | [20]                                                                                                                                                                                                                                                                                                                             |
| PI9-8  | 399.1947 | 8.1025  | -0.5 | C <sub>20</sub> H <sub>40</sub> O <sub>6</sub>  | [M+Na] <sup>+</sup>    | 227.1258, 238.1479                            | 3,6,8,11-Tetrahydroxy-16,17-dimethyloctadecanoic acid                         | Lipid | Marine <i>Streptomyces</i> sp. | antibacterial |    | [21]                                                                                                                                                                                                                                                                                                                             |
| PI9-9  | 615.3717 | 7.2118  | -0.5 | C <sub>30</sub> H <sub>56</sub> O <sub>11</sub> | [M+Na] <sup>+</sup>    | 429.2458, 243.1213, 395.24, 209.116, 411.2351 | 9-Hydroxy-exophilin A                                                         |       | marine <i>Fusarium</i> sp.     | algicide      |  | [22]                                                                                                                                                                                                                                                                                                                             |
| PI9-10 | 611.3404 | 7.7767  | -4.1 | C <sub>32</sub> H <sub>50</sub> O <sub>11</sub> | [M+H] <sup>+</sup>     | 221.0797, 413.2508, 209.1174                  | WF 17819                                                                      |       | <i>Ochroconis</i> sp.          |               | Struct. unknown                                                                       | [23]                                                                                                                                                                                                                                                                                                                             |

## Supplementary References

- Shimajima, Y.; Hayashi, H.; Ooka, T.; Shibukawa, M.; Iitaka, Y. Studies on AI-77s, microbial products with gastroprotective activity. Structures and the chemical nature of AI-77s. *Tetrahedron* **1984**, *40*, 2519-2527.doi: [https://doi.org/10.1016/S0040-4020\(01\)83504-3](https://doi.org/10.1016/S0040-4020(01)83504-3).
- Berrue, F.; Ibrahim, A.; Boland, P.; Kerr, R.G. Newly isolated marine *Bacillus pumilus* (SP21): A source of novel lipoamides and other antimicrobial agents. *Pure Appl. Chem.* **2009**, *81*, 1027-1031.doi: [doi:10.1351/PAC-CON-08-09-25](https://doi.org/10.1351/PAC-CON-08-09-25).
- Sugawara, T.; Tanaka, A.; Imai, H.; Nagai, K.; Suzuki, K. YM-47515, a novel isonitrile antibiotic from *Micromonospora echinospora* subsp. *echinospora*. *J. Antibiot. (Tokyo)* **1997**, *50*, 944-8.doi: [10.7164/antibiotics.50.944](https://doi.org/10.7164/antibiotics.50.944).
- Zafirir Ilan, E.; Torres, M.R.; Prudhomme, J.; Le Roch, K.; Jensen, P.R.; Fenical, W. Farnesides A and B, sesquiterpenoid nucleoside ethers from a marine-derived *Streptomyces* sp., strain CNT-372 from Fiji. *J. Nat. Prod.* **2013**, *76*, 1815-8.doi: [10.1021/np400351t](https://doi.org/10.1021/np400351t).
- Costa, M.; Zuniga, P.; Penalver, A.M.; Thorsteinsdottir, M.; Perez, M.; Canedo, L.M.; Cuevas, C. New fluvirucinins C1 and C2 produced by a marine derived actinomycete. *Nat. Prod. Commun.* **2017**, *12*, 679-682.doi: [10.1080/15584594.2017.1344444](https://doi.org/10.1080/15584594.2017.1344444).
- Itoh, J.; Omoto, S.; Nishizawa, N.; Kodama, Y.; Inouye, S. Chemical structures of amicoumacins produced by *Bacillus pumilus*. *Agric. Biol. Chem.* **1982**, *46*, 2659-2665.doi: [10.1080/00021369.1982.10865491](https://doi.org/10.1080/00021369.1982.10865491).
- Bruns, H.; Ziesche, L.; Taniwal, N.K.; Wolter, L.; Brinkhoff, T.; Herrmann, J.; Muller, R.; Schulz, S. N-Acylated amino acid methyl esters from marine Roseobacter group bacteria. *Beilstein J. Org. Chem.* **2018**, *14*, 2964-2973.doi: [10.3762/bjoc.14.276](https://doi.org/10.3762/bjoc.14.276).
- Vértessy, L.; Fehlhaber, H.-W.; Kogler, H.; Schindler, P.W. Enkastines: Amadori Products with a Specific Inhibiting Action against Endopeptidase – 24.11 – from *Streptomyces albus* and by Synthesis. *Liebigs Annalen* **1996**, *1996*, 121-126.doi: <https://doi.org/10.1002/jlac.199619960120>.
- Ram, H.; Kumar Sahu, A.; Said, M.S.; Banpurkar, A.G.; Gajbhiye, J.M.; Dastager, S.G. A novel fatty alkene from marine bacteria: A thermo stable biosurfactant and its applications. *J. Hazard. Mater.* **2019**, *380*, 120868.doi: [10.1016/j.jhazmat.2019.120868](https://doi.org/10.1016/j.jhazmat.2019.120868).
- Isono, K.; Nagatsu, J.; Kobinata, K.; Sasaki, K.; Suzuki, S. Studies on polyoxins, Antifungal Antibiotics. *Agric. Biol. Chem.* **1967**, *31*, 190-199.doi: [10.1080/00021369.1967.10858788](https://doi.org/10.1080/00021369.1967.10858788).
- Ding, N.; Jiang, Y.; Han, L.; Chen, X.; Ma, J.; Qu, X.; Mu, Y.; Liu, J.; Li, L.; Jiang, C.; Huang, X. Bafilomycins and odoriferous sesquiterpenoids from *Streptomyces albolongus* isolated from *Elephas maximus* Feces. *J. Nat. Prod.* **2016**, *79*, 799-805.doi: [10.1021/acs.jnatprod.5b00827](https://doi.org/10.1021/acs.jnatprod.5b00827).
- Zhang, J.; Jiang, Y.; Cao, Y.; Liu, J.; Zheng, D.; Chen, X.; Han, L.; Jiang, C.; Huang, X. Violapyrones A-G, alpha-pyrone derivatives from *Streptomyces violascens* isolated from *Hylobates hoolock* feces. *J. Nat. Prod.* **2013**, *76*, 2126-30.doi: [10.1021/np4003417](https://doi.org/10.1021/np4003417).
- Cvejić, J.H.; Bodrossy, L.; Kovacs, K.L.; Rohmer, M. Bacterial triterpenoids of the hopane series from the methanotrophic bacteria *Methylocaldum* spp.: phylogenetic implications and first evidence for an unsaturated aminobacteriohopanepolyol. *FEMS Microbiol. Lett.* **2000**, *182*, 361-5.doi: [10.1111/j.1574-6968.2000.tb08922.x](https://doi.org/10.1111/j.1574-6968.2000.tb08922.x).
- Kawahara, K.; Kuraishi, H.; Zähringer, U. Chemical structure and function of glycosphingolipids of *Sphingomonas* spp and their distribution among members of the  $\alpha$ -4 subclass of Proteobacteria. *J. Ind. Microbiol. Biotechnol.* **1999**, *23*, 408-413.doi: [10.1038/sj.jim.2900708](https://doi.org/10.1038/sj.jim.2900708).
- Harrigan, G.G.; Luesch, H.; Yoshida, W.Y.; Moore, R.E.; Nagle, D.G.; Biggs, J.; Park, P.U.; Paul, V.J. Tumonoic acids, novel metabolites from a cyanobacterial assemblage of *Lyngbya majuscula* and *Schizothrix calcicola*. *J. Nat. Prod.* **1999**, *62*, 464-7.doi: [10.1021/np980460u](https://doi.org/10.1021/np980460u).
- Roggo, B.E.; Petersen, F.; Delmendo, R.; Jenny, H.B.; Peter, H.H.; Roesel, J. 3-Alkanoyl-5-hydroxymethyl tetronic acid homologues and resistomycin: new inhibitors of HIV-1 protease. I. Fermentation, isolation and biological activity. *J. Antibiot. (Tokyo)* **1994**, *47*, 136-42.doi: [10.7164/antibiotics.47.136](https://doi.org/10.7164/antibiotics.47.136).
- Huang, H.; Yao, Y.; He, Z.; Yang, T.; Ma, J.; Tian, X.; Li, Y.; Huang, C.; Chen, X.; Li, W.; Zhang, S.; Zhang, C.; Ju, J. Antimalarial beta-carboline and indolactam alkaloids from *Marinactinospora thermotolerans*, a deep sea isolate. *J. Nat. Prod.* **2011**, *74*, 2122-7.doi: [10.1021/np200399t](https://doi.org/10.1021/np200399t).

18. Christner, C.; Kullertz, G.; Fischer, G.; Zerlin, M.; Grabley, S.; Thiericke, R.; Taddei, A.; Zeeck, A. Albocycline- and carbomycin-type macrolides, inhibitors of human prolyl endopeptidases. *J. Antibiot. (Tokyo)* **1998**, *51*, 368-71.doi: 10.7164/antibiotics.51.368.
19. Bischoff, K.M.; Leathers, T.D.; Price, N.P.; Manitchotpisit, P. Liamocin oil from *Aureobasidium pullulans* has antibacterial activity with specificity for species of *Streptococcus*. *J. Antibiot. (Tokyo)* **2015**, *68*, 642-645.doi: 10.1038/ja.2015.39.
20. Klausner, R.D.; Donaldson, J.G.; Lippincott-Schwartz, J. Brefeldin A: insights into the control of membrane traffic and organelle structure. *J. Cell Biol.* **1992**, *116*, 1071-1080.
21. Viegelmann, C.; Margassery, L.M.; Kennedy, J.; Zhang, T.; O'Brien, C.; O'Gara, F.; Morrissey, J.P.; Dobson, A.D.; Edrada-Ebel, R. Metabolomic profiling and genomic study of a marine sponge-associated *Streptomyces* sp. *Mar. Drugs* **2014**, *12*, 3323-51.doi: 10.3390/md12063323.
22. Chen, C.; Imamura, N.; Nishijima, M.; Adachi, K.; Sakai, M.; Sano, H. Halymecins, new antimicroalgal substances produced by fungi isolated from marine algae. *J. Antibiot. (Tokyo)* **1996**, *49*, 998-1005.
23. UK Patent 2 293 379 (isol, ir, pmr, cmr, props). 1996.
